# Supplementary material for: Proteomic Characterization of Proliferation Inhibition of Well-Differentiated Laryngeal Squamous Cell Carcinoma Cells Under Below-Background Radiation in a Deep Underground Environment
Source: Front Public Health. 2020 Oct 30;8:584964. doi: 10.3389/fpubh.2020.584964 (PMC7661695; doi:10.3389/fpubh.2020.584964)
Supplement: Supplementary file 2 [file Table_2.XLSX]

## Sheet: Tablib Dataset
maxLevel	levels	GO_Name	GO_ID	Pvalue	Pvalue_adjusted	PAS_Value	PAS_Zscore	max_zscore	min_zscore	Genes	Count	Pop_Hit	List_Total	Background_Genes	URL	PATHS
biological progress
2	2	cellular component organization or biogenesis	GO:0071840	4.23e-62	2.11e-58	-36.54	-8.59	2.23503	-16.2741	AHSG|0.165015314;TMOD2|0.290984687;APOA1|0.31876546;UBE2I|0.344198515;DKFZP779G1236|0.388707246;C3|0.394006372;OGN|0.405744036;COL3A1|0.411903132;A2M|0.413020489;TBC1D10B|0.465209156;KRT9|0.470400915;KRT10|0.498333434;CCN1|0.499878168;CALML5|0.519101998;S100A10|0.549868375;IGKC|0.551780631;KRT2|0.571880999;DICER1|0.578034476;B7Z2X4|0.587307156;NUCKS1|0.615706656;AFDN|0.618161506;KRT5|0.621125689;…	272	15166	562	85180	http://www.ebi.ac.uk/QuickGO/GTerm?id=GO:0071840	[]
3	3	cellular component organization	GO:0016043	4.62e-57	1.15e-53	-35.31	-8.29	2.23503	-16.2741	AHSG|0.165015314;TMOD2|0.290984687;APOA1|0.31876546;UBE2I|0.344198515;DKFZP779G1236|0.388707246;C3|0.394006372;OGN|0.405744036;COL3A1|0.411903132;A2M|0.413020489;TBC1D10B|0.465209156;KRT9|0.470400915;KRT10|0.498333434;CCN1|0.499878168;CALML5|0.519101998;S100A10|0.549868375;IGKC|0.551780631;KRT2|0.571880999;DICER1|0.578034476;B7Z2X4|0.587307156;NUCKS1|0.615706656;AFDN|0.618161506;KRT5|0.621125689;…	260	14739	562	85180	http://www.ebi.ac.uk/QuickGO/GTerm?id=GO:0016043	[]
3	3	cellular component biogenesis	GO:0044085	3.54e-47	5.89e-44	-19.96	-4.58	2.23503	-16.2741	TMOD2|0.290984687;DKFZP779G1236|0.388707246;TBC1D10B|0.465209156;KRT10|0.498333434;CCN1|0.499878168;S100A10|0.549868375;DICER1|0.578034476;B7Z2X4|0.587307156;AFDN|0.618161506;KRT5|0.621125689;F5|0.632416688;B2M|0.633401502;HMGA1|0.639503882;NAP1L1|0.642362426;GABARAPL1|0.650717522;MTLN|0.652786028;SF3A2|0.662200939;RBX1|0.676761719;DYNLL2|0.679344869;TRIP6|0.680463841;ATP5IF1|0.68560565;UQCR10|0.…	157	6520	562	85180	http://www.ebi.ac.uk/QuickGO/GTerm?id=GO:0044085	[]
4	4	macromolecular complex subunit organization	GO:0043933	2.16e-44	2.69e-41	-18.11	-4.13	2.23503	-16.2741	TMOD2|0.290984687;APOA1|0.31876546;COL3A1|0.411903132;KRT9|0.470400915;KRT10|0.498333434;S100A10|0.549868375;DICER1|0.578034476;B7Z2X4|0.587307156;AFDN|0.618161506;F5|0.632416688;B2M|0.633401502;HMGA1|0.639503882;NAP1L1|0.642362426;HMGB3|0.648004487;MTLN|0.652786028;SF3A2|0.662200939;RBX1|0.676761719;ATP5IF1|0.68560565;UQCR10|0.689938003;SNRPF|0.692465503;LUM|0.6985652;KRT14|0.698836609;MDN1|0.69…	142	5647	562	85180	http://www.ebi.ac.uk/QuickGO/GTerm?id=GO:0043933	[]
7	6,7	mRNA metabolic process	GO:0016071	8.49e-39	8.46e-36	-8.27	-1.75	2.23503	-16.2741	RBM3|0.44702786;SREK1|0.563482286;SF3A2|0.662200939;SNRPF|0.692465503;RPL39|0.706436187;DDX46|0.719087144;RPS28|0.728473288;SLU7|0.733660891;ZMAT2|0.73556006;VIRMA|0.737046555;SUPT4H1|0.748180409;TRA2A|0.757140461;RPL30|0.75735901;RPL37A|0.762264792;RPL22|0.762752268;SMNDC1|0.765367076;RPL38|0.769231504;LSM6|0.770159313;SNRPG|0.770645124;SRSF2|0.773591554;RPL35A|0.774533243;RPS12|0.775170818;Q53G…	73	1572	562	85180	http://www.ebi.ac.uk/QuickGO/GTerm?id=GO:0016071	[]
7	6,7	RNA processing	GO:0006396	5.3e-36	4.4e-33	-9.84	-2.13	2.23503	-16.2741	RBM3|0.44702786;SREK1|0.563482286;DICER1|0.578034476;SF3A2|0.662200939;SNRPF|0.692465503;MDN1|0.699044067;RPL39|0.706436187;DDX46|0.719087144;URM1|0.720766403;RPS28|0.728473288;SLU7|0.733660891;ZMAT2|0.73556006;VIRMA|0.737046555;SUPT4H1|0.748180409;TRA2A|0.757140461;RPL30|0.75735901;RPL37A|0.762264792;RPL22|0.762752268;SMNDC1|0.765367076;RPL38|0.769231504;LSM6|0.770159313;SNRPG|0.770645124;SRSF2|…	86	2493	562	85180	http://www.ebi.ac.uk/QuickGO/GTerm?id=GO:0006396	[]
5	5	protein complex subunit organization	GO:0071822	7.11e-36	5.06e-33	-13.21	-2.94	2.23503	-16.2741	TMOD2|0.290984687;COL3A1|0.411903132;KRT9|0.470400915;KRT10|0.498333434;S100A10|0.549868375;DICER1|0.578034476;B7Z2X4|0.587307156;F5|0.632416688;HMGA1|0.639503882;NAP1L1|0.642362426;RBX1|0.676761719;ATP5IF1|0.68560565;UQCR10|0.689938003;LUM|0.6985652;KRT14|0.698836609;MDN1|0.699044067;BRK1|0.701952381;UQCC3|0.702029786;RPL39|0.706436187;COX19|0.709781956;PFN2|0.7117008;VAMP3|0.712248408;RPS28|0.7…	105	3782	562	85180	http://www.ebi.ac.uk/QuickGO/GTerm?id=GO:0071822	[]
2	2	negative regulation of biological process	GO:0048519	5.52e-34	3.43e-31	-24.29	-5.63	2.23503	-16.2741	AHSG|0.165015314;ITIH4|0.195366342;TMOD2|0.290984687;SERPINA7|0.30609263;SERPINF2|0.324532694;ITIH2|0.337612986;UBE2I|0.344198515;MT1A|0.349236331;C3|0.394006372;OGN|0.405744036;COL3A1|0.411903132;A2M|0.413020489;PLG|0.416710346;RBM3|0.44702786;MTDH|0.453094976;MT1E|0.485906869;CCN1|0.499878168;C4A|0.555642373;DICER1|0.578034476;B7Z2X4|0.587307156;AFDN|0.618161506;THBS1|0.622227832;B2M|0.63340150…	160	8677	562	85180	http://www.ebi.ac.uk/QuickGO/GTerm?id=GO:0048519	[]
6	5,6	single-organism intracellular transport	GO:1902582	9.27e-32	5.13e-29	-9.65	-2.08	2.23503	-16.2741	TBC1D10B|0.465209156;VPS37B|0.631454412;F5|0.632416688;CHMP6|0.643936161;DYNLL2|0.679344869;TRIP6|0.680463841;ATP5IF1|0.68560565;TRAPPC2|0.69380674;RPL39|0.706436187;SEC61B|0.709169703;VAMP3|0.712248408;RPS28|0.728473288;SLU7|0.733660891;WFS1|0.735091571;HSPB11|0.73755015;ATP5ME|0.738082044;SRP19|0.743668814;DPY30|0.750444942;DYNLL1|0.756626393;RPL30|0.75735901;TMSB4X|0.757648484;RPL37A|0.7622647…	85	2787	562	85180	http://www.ebi.ac.uk/QuickGO/GTerm?id=GO:1902582	[]
5	5	macromolecular complex assembly	GO:0065003	1.58e-31	7.85e-29	-12.61	-2.8	2.23503	-16.2741	TMOD2|0.290984687;KRT10|0.498333434;S100A10|0.549868375;DICER1|0.578034476;B7Z2X4|0.587307156;AFDN|0.618161506;F5|0.632416688;B2M|0.633401502;HMGA1|0.639503882;NAP1L1|0.642362426;MTLN|0.652786028;SF3A2|0.662200939;RBX1|0.676761719;ATP5IF1|0.68560565;UQCR10|0.689938003;SNRPF|0.692465503;MDN1|0.699044067;BRK1|0.701952381;UQCC3|0.702029786;COX19|0.709781956;PFN2|0.7117008;VAMP3|0.712248408;COPS7B|0.…	100	3879	562	85180	http://www.ebi.ac.uk/QuickGO/GTerm?id=GO:0065003	[]
4	4	cellular component assembly	GO:0022607	3.53e-31	1.6e-28	-16.46	-3.73	2.23503	-16.2741	TMOD2|0.290984687;DKFZP779G1236|0.388707246;TBC1D10B|0.465209156;KRT10|0.498333434;S100A10|0.549868375;DICER1|0.578034476;B7Z2X4|0.587307156;AFDN|0.618161506;KRT5|0.621125689;F5|0.632416688;B2M|0.633401502;HMGA1|0.639503882;NAP1L1|0.642362426;GABARAPL1|0.650717522;MTLN|0.652786028;SF3A2|0.662200939;RBX1|0.676761719;DYNLL2|0.679344869;TRIP6|0.680463841;ATP5IF1|0.68560565;UQCR10|0.689938003;SNRPF|0…	125	5946	562	85180	http://www.ebi.ac.uk/QuickGO/GTerm?id=GO:0022607	[]
3	3	interspecies interaction between organisms	GO:0044419	2.26e-30	9.37e-28	-7.36	-1.53	2.23503	-16.2741	UBE2I|0.344198515;DICER1|0.578034476;NUCKS1|0.615706656;B2M|0.633401502;DCD|0.635067998;HMGA1|0.639503882;LYZ|0.665935809;RBX1|0.676761719;BST2|0.706116009;RPL39|0.706436187;HMGN2|0.711668935;RPS28|0.728473288;KRT8|0.7324449;ISG15|0.737647493;BANF1|0.738362322;SUPT4H1|0.748180409;DYNLL1|0.756626393;RPL30|0.75735901;RPL37A|0.762264792;RPL22|0.762752268;RPL38|0.769231504;RPL35A|0.774533243;RPS12|0.…	58	1279	562	85180	http://www.ebi.ac.uk/QuickGO/GTerm?id=GO:0044419	[]
4	4	ribonucleoprotein complex biogenesis	GO:0022613	2.8e-30	1.07e-27	-5.91	-1.18	2.23503	-16.2741	DICER1|0.578034476;SF3A2|0.662200939;SNRPF|0.692465503;MDN1|0.699044067;RPL39|0.706436187;RPS28|0.728473288;SLU7|0.733660891;PTGES3|0.740596409;RPL30|0.75735901;RPL37A|0.762264792;RPL22|0.762752268;SMNDC1|0.765367076;RPL38|0.769231504;LSM6|0.770159313;SNRPG|0.770645124;RPS21|0.773761839;RPL35A|0.774533243;RPS12|0.775170818;LYAR|0.779784643;RPL34|0.78373684;RBIS|0.788859982;NCL|0.788878594;RPS25|0…	53	1038	562	85180	http://www.ebi.ac.uk/QuickGO/GTerm?id=GO:0022613	[]
5	5	viral process	GO:0016032	2.15e-29	7.65e-27	-6.66	-1.36	2.23503	-16.2741	UBE2I|0.344198515;DICER1|0.578034476;NUCKS1|0.615706656;B2M|0.633401502;HMGA1|0.639503882;RBX1|0.676761719;BST2|0.706116009;RPL39|0.706436187;RPS28|0.728473288;KRT8|0.7324449;ISG15|0.737647493;BANF1|0.738362322;SUPT4H1|0.748180409;DYNLL1|0.756626393;RPL30|0.75735901;RPL37A|0.762264792;RPL22|0.762752268;RPL38|0.769231504;RPL35A|0.774533243;RPS12|0.775170818;RPL34|0.78373684;RANBP1|0.786662623;RPS2…	53	1083	562	85180	http://www.ebi.ac.uk/QuickGO/GTerm?id=GO:0016032	[]
5	5	cellular protein metabolic process	GO:0044267	2.93e-29	9.72e-27	-27.81	-6.48	2.23503	-16.2741	AHSG|0.165015314;AFP|0.18609243;ITIH4|0.195366342;SERPINA7|0.30609263;SERPINF2|0.324532694;ITIH2|0.337612986;UBE2I|0.344198515;C3|0.394006372;COL3A1|0.411903132;A2M|0.413020489;RBM3|0.44702786;FSTL1|0.45386571;KRT10|0.498333434;CCN1|0.499878168;B4DRL9|0.546826669;C4A|0.555642373;KRT2|0.571880999;DICER1|0.578034476;FKBP14|0.614019585;UEVLD|0.616544582;F5|0.632416688;B2M|0.633401502;SCYL1|0.6357104…	200	13787	562	85180	http://www.ebi.ac.uk/QuickGO/GTerm?id=GO:0044267	[]
4	4	symbiosis, encompassing mutualism through parasitism	GO:0044403	4.21e-29	1.31e-26	-6.84	-1.4	2.23503	-16.2741	UBE2I|0.344198515;DICER1|0.578034476;NUCKS1|0.615706656;B2M|0.633401502;HMGA1|0.639503882;RBX1|0.676761719;BST2|0.706116009;RPL39|0.706436187;RPS28|0.728473288;KRT8|0.7324449;ISG15|0.737647493;BANF1|0.738362322;SUPT4H1|0.748180409;DYNLL1|0.756626393;RPL30|0.75735901;RPL37A|0.762264792;RPL22|0.762752268;RPL38|0.769231504;RPL35A|0.774533243;RPS12|0.775170818;RPL34|0.78373684;RANBP1|0.786662623;RPS2…	55	1198	562	85180	http://www.ebi.ac.uk/QuickGO/GTerm?id=GO:0044403	[]
3	3	negative regulation of metabolic process	GO:0009892	5.8e-29	1.68e-26	-15.45	-3.49	2.23503	-16.2741	AHSG|0.165015314;ITIH4|0.195366342;SERPINA7|0.30609263;SERPINF2|0.324532694;ITIH2|0.337612986;UBE2I|0.344198515;C3|0.394006372;A2M|0.413020489;RBM3|0.44702786;C4A|0.555642373;DICER1|0.578034476;HMGA1|0.639503882;ATP5IF1|0.68560565;COMMD3-BMI1|0.694229533;BST2|0.706116009;RPL39|0.706436187;CBX3|0.718236075;SERPINF1|0.726790191;POLE3|0.726924773;TCF25|0.728049538;RPS28|0.728473288;WFS1|0.735091571;…	109	4908	562	85180	http://www.ebi.ac.uk/QuickGO/GTerm?id=GO:0009892	[]
9	7,8,9	protein targeting to ER	GO:0045047	6.06e-29	1.68e-26	-2.91	-0.45	2.23503	-16.2741	RPL39|0.706436187;SEC61B|0.709169703;RPS28|0.728473288;SRP19|0.743668814;RPL30|0.75735901;RPL37A|0.762264792;RPL22|0.762752268;RPL38|0.769231504;RPL35A|0.774533243;RPS12|0.775170818;RPL34|0.78373684;RPS25|0.794752097;RPS27|0.806228236;RPL36|0.812559553;RPL26|0.812963546;RPS26|0.815287739;FAU|0.824244219;RPLP2|0.825870804;RPL36A|0.828686725;RPL7|1.222072052;SRPRA|1.235897594;RPS2|1.238051864;SRPRB…	27	171	562	85180	http://www.ebi.ac.uk/QuickGO/GTerm?id=GO:0045047	[]
4	4	cellular component disassembly	GO:0022411	7.61e-29	1.99e-26	-7.65	-1.6	2.23503	-16.2741	TMOD2|0.290984687;C3|0.394006372;COL3A1|0.411903132;A2M|0.413020489;DICER1|0.578034476;B7Z2X4|0.587307156;HMGA1|0.639503882;GABARAPL1|0.650717522;ATP5IF1|0.68560565;SNRPF|0.692465503;RPL39|0.706436187;RPS28|0.728473288;MTPN|0.733775741;BANF1|0.738362322;CST3|0.740573232;RPL30|0.75735901;RPL37A|0.762264792;RPL22|0.762752268;RPL38|0.769231504;DFFA|0.770068444;DNASE2|0.772934476;RPL35A|0.774533243;R…	56	1264	562	85180	http://www.ebi.ac.uk/QuickGO/GTerm?id=GO:0022411	[]
3	3	multi-organism cellular process	GO:0044764	9.42e-29	2.35e-26	-6.14	-1.24	2.23503	-16.2741	UBE2I|0.344198515;DICER1|0.578034476;B2M|0.633401502;HMGA1|0.639503882;RBX1|0.676761719;BST2|0.706116009;RPL39|0.706436187;RPS28|0.728473288;KRT8|0.7324449;ISG15|0.737647493;BANF1|0.738362322;SUPT4H1|0.748180409;DYNLL1|0.756626393;RPL30|0.75735901;RPL37A|0.762264792;RPL22|0.762752268;RPL38|0.769231504;RPL35A|0.774533243;RPS12|0.775170818;RPL34|0.78373684;RANBP1|0.786662623;RPS25|0.794752097;ITGA2…	49	926	562	85180	http://www.ebi.ac.uk/QuickGO/GTerm?id=GO:0044764	[]
8	6,7,8	establishment of protein localization to endoplasmic reticulum	GO:0072599	1.16e-28	2.76e-26	-2.91	-0.45	2.23503	-16.2741	RPL39|0.706436187;SEC61B|0.709169703;RPS28|0.728473288;SRP19|0.743668814;RPL30|0.75735901;RPL37A|0.762264792;RPL22|0.762752268;RPL38|0.769231504;RPL35A|0.774533243;RPS12|0.775170818;RPL34|0.78373684;RPS25|0.794752097;RPS27|0.806228236;RPL36|0.812559553;RPL26|0.812963546;RPS26|0.815287739;FAU|0.824244219;RPLP2|0.825870804;RPL36A|0.828686725;RPL7|1.222072052;SRPRA|1.235897594;RPS2|1.238051864;SRPRB…	27	175	562	85180	http://www.ebi.ac.uk/QuickGO/GTerm?id=GO:0072599	[]
4	4	cellular catabolic process	GO:0044248	1.67e-28	3.77e-26	-13.18	-2.94	2.23503	-16.2741	APOA1|0.31876546;UBE2I|0.344198515;OGN|0.405744036;DICER1|0.578034476;FABP5|0.644041386;GABARAPL1|0.650717522;C18orf25|0.651643869;LYZ|0.665935809;RBX1|0.676761719;DYNLL2|0.679344869;ATP5IF1|0.68560565;SNRPF|0.692465503;LUM|0.6985652;RPL39|0.706436187;SEC61B|0.709169703;RPS28|0.728473288;WFS1|0.735091571;TIMP3|0.735801776;PIK3C3|0.736738787;ISG15|0.737647493;CST3|0.740573232;DYNLL1|0.756626393;RP…	108	4888	562	85180	http://www.ebi.ac.uk/QuickGO/GTerm?id=GO:0044248	[]
3	3	cellular localization	GO:0051641	1.9e-28	4.12e-26	-15.83	-3.58	2.23503	-16.2741	A2M|0.413020489;TBC1D10B|0.465209156;B4DRL9|0.546826669;S100A10|0.549868375;AFDN|0.618161506;VPS37B|0.631454412;F5|0.632416688;HMGA1|0.639503882;CHMP6|0.643936161;DYNLL2|0.679344869;TRIP6|0.680463841;ATP5IF1|0.68560565;SNRPF|0.692465503;RAB30|0.692572099;TRAPPC2|0.69380674;BST2|0.706116009;RPL39|0.706436187;SEC61B|0.709169703;VAMP3|0.712248408;RPS28|0.728473288;TAX1BP3|0.729364023;SLU7|0.73366089…	133	7093	562	85180	http://www.ebi.ac.uk/QuickGO/GTerm?id=GO:0051641	[]
6	5,6	establishment of protein localization to membrane	GO:0090150	3.07e-28	6.38e-26	-4.68	-0.88	2.23503	-16.2741	S100A10|0.549868375;AFDN|0.618161506;DYNLL2|0.679344869;RPL39|0.706436187;SEC61B|0.709169703;VAMP3|0.712248408;RPS28|0.728473288;SRP19|0.743668814;DYNLL1|0.756626393;RPL30|0.75735901;RPL37A|0.762264792;RPL22|0.762752268;RPL38|0.769231504;RPL35A|0.774533243;RPS12|0.775170818;BID|0.782479774;RPL34|0.78373684;RPS25|0.794752097;TIMM13|0.79837512;RPS27|0.806228236;TOMM22|0.806813773;RPL36|0.812559553;…	41	608	562	85180	http://www.ebi.ac.uk/QuickGO/GTerm?id=GO:0090150	[]
6	4,5,6	negative regulation of macromolecule metabolic process	GO:0010605	4.19e-28	8.35e-26	-14.69	-3.3	2.23503	-16.2741	AHSG|0.165015314;ITIH4|0.195366342;SERPINA7|0.30609263;SERPINF2|0.324532694;ITIH2|0.337612986;UBE2I|0.344198515;C3|0.394006372;A2M|0.413020489;RBM3|0.44702786;C4A|0.555642373;DICER1|0.578034476;HMGA1|0.639503882;COMMD3-BMI1|0.694229533;BST2|0.706116009;RPL39|0.706436187;CBX3|0.718236075;SERPINF1|0.726790191;POLE3|0.726924773;TCF25|0.728049538;RPS28|0.728473288;WFS1|0.735091571;TIMP3|0.735801776;I…	102	4451	562	85180	http://www.ebi.ac.uk/QuickGO/GTerm?id=GO:0010605	[]
4	4	cellular macromolecule metabolic process	GO:0044260	5.97e-28	1.14e-25	-39.66	-9.34	2.23503	-16.2741	AHSG|0.165015314;AFP|0.18609243;ITIH4|0.195366342;SERPINA7|0.30609263;SERPINF2|0.324532694;ITIH2|0.337612986;UBE2I|0.344198515;C3|0.394006372;COL3A1|0.411903132;A2M|0.413020489;RBM3|0.44702786;FSTL1|0.45386571;KRT10|0.498333434;CCN1|0.499878168;B4DRL9|0.546826669;C4A|0.555642373;SREK1|0.563482286;KRT2|0.571880999;DICER1|0.578034476;FKBP14|0.614019585;NUCKS1|0.615706656;UEVLD|0.616544582;F5|0.6324…	304	27088	562	85180	http://www.ebi.ac.uk/QuickGO/GTerm?id=GO:0044260	[]
7	7	protein localization to endoplasmic reticulum	GO:0070972	6.73e-28	1.24e-25	-3.11	-0.5	2.23503	-16.2741	RPL39|0.706436187;SEC61B|0.709169703;RPS28|0.728473288;SRP19|0.743668814;RPL30|0.75735901;RPL37A|0.762264792;RPL22|0.762752268;RPL38|0.769231504;RPL35A|0.774533243;RPS12|0.775170818;RPL34|0.78373684;RPS25|0.794752097;RPS27|0.806228236;RPL36|0.812559553;RPL26|0.812963546;RPS26|0.815287739;FAU|0.824244219;RPLP2|0.825870804;RPL36A|0.828686725;RPL7|1.222072052;SRPRA|1.235897594;RPS2|1.238051864;SRPRB…	28	209	562	85180	http://www.ebi.ac.uk/QuickGO/GTerm?id=GO:0070972	[]
4	4	establishment of localization in cell	GO:0051649	1.62e-27	2.8e-25	-13.86	-3.1	2.23503	-16.2741	A2M|0.413020489;TBC1D10B|0.465209156;B4DRL9|0.546826669;VPS37B|0.631454412;F5|0.632416688;HMGA1|0.639503882;CHMP6|0.643936161;DYNLL2|0.679344869;TRIP6|0.680463841;ATP5IF1|0.68560565;SNRPF|0.692465503;RAB30|0.692572099;TRAPPC2|0.69380674;BST2|0.706116009;RPL39|0.706436187;SEC61B|0.709169703;VAMP3|0.712248408;RPS28|0.728473288;SLU7|0.733660891;WFS1|0.735091571;HSPB11|0.73755015;ATP5ME|0.738082044;B…	117	5801	562	85180	http://www.ebi.ac.uk/QuickGO/GTerm?id=GO:0051649	[]
9	8,9	SRP-dependent cotranslational protein targeting to membrane	GO:0006614	1.63e-27	2.8e-25	-2.68	-0.4	2.23503	-16.2741	RPL39|0.706436187;SEC61B|0.709169703;RPS28|0.728473288;SRP19|0.743668814;RPL30|0.75735901;RPL37A|0.762264792;RPL22|0.762752268;RPL38|0.769231504;RPL35A|0.774533243;RPS12|0.775170818;RPL34|0.78373684;RPS25|0.794752097;RPS27|0.806228236;RPL36|0.812559553;RPL26|0.812963546;RPS26|0.815287739;FAU|0.824244219;RPLP2|0.825870804;RPL36A|0.828686725;RPL7|1.222072052;SRPRA|1.235897594;RPS2|1.238051864;SRPRB…	25	150	562	85180	http://www.ebi.ac.uk/QuickGO/GTerm?id=GO:0006614	[]
6	6	protein complex disassembly	GO:0043241	1.72e-27	2.86e-25	-4.68	-0.88	2.23503	-16.2741	TMOD2|0.290984687;B7Z2X4|0.587307156;HMGA1|0.639503882;RPL39|0.706436187;RPS28|0.728473288;MTPN|0.733775741;RPL30|0.75735901;RPL37A|0.762264792;RPL22|0.762752268;RPL38|0.769231504;RPL35A|0.774533243;RPS12|0.775170818;DSTN|0.77562208;RPL34|0.78373684;CFL2|0.785308365;MID1IP1|0.790211093;RPS25|0.794752097;RPS27|0.806228236;RPL36|0.812559553;RPL26|0.812963546;MRPS17|0.814955937;RPS26|0.815287739;MRP…	39	558	562	85180	http://www.ebi.ac.uk/QuickGO/GTerm?id=GO:0043241	[]
8	7,8	cotranslational protein targeting to membrane	GO:0006613	2.75e-27	4.41e-25	-2.68	-0.4	2.23503	-16.2741	RPL39|0.706436187;SEC61B|0.709169703;RPS28|0.728473288;SRP19|0.743668814;RPL30|0.75735901;RPL37A|0.762264792;RPL22|0.762752268;RPL38|0.769231504;RPL35A|0.774533243;RPS12|0.775170818;RPL34|0.78373684;RPS25|0.794752097;RPS27|0.806228236;RPL36|0.812559553;RPL26|0.812963546;RPS26|0.815287739;FAU|0.824244219;RPLP2|0.825870804;RPL36A|0.828686725;RPL7|1.222072052;SRPRA|1.235897594;RPS2|1.238051864;SRPRB…	25	153	562	85180	http://www.ebi.ac.uk/QuickGO/GTerm?id=GO:0006613	[]
5	4,5	intracellular transport	GO:0046907	3.19e-27	4.96e-25	-12.18	-2.7	2.23503	-16.2741	TBC1D10B|0.465209156;B4DRL9|0.546826669;VPS37B|0.631454412;F5|0.632416688;HMGA1|0.639503882;CHMP6|0.643936161;DYNLL2|0.679344869;TRIP6|0.680463841;ATP5IF1|0.68560565;SNRPF|0.692465503;RAB30|0.692572099;TRAPPC2|0.69380674;BST2|0.706116009;RPL39|0.706436187;SEC61B|0.709169703;VAMP3|0.712248408;RPS28|0.728473288;SLU7|0.733660891;WFS1|0.735091571;HSPB11|0.73755015;ATP5ME|0.738082044;BANF1|0.738362322…	103	4651	562	85180	http://www.ebi.ac.uk/QuickGO/GTerm?id=GO:0046907	[]
5	5	gene expression	GO:0010467	1.29e-26	1.95e-24	-25.82	-6	2.23503	-16.2741	UBE2I|0.344198515;C3|0.394006372;A2M|0.413020489;RBM3|0.44702786;FSTL1|0.45386571;CCN1|0.499878168;IGKC|0.551780631;SREK1|0.563482286;DICER1|0.578034476;NUCKS1|0.615706656;AFDN|0.618161506;HMGA1|0.639503882;HMGB3|0.648004487;COX6C|0.660758761;SF3A2|0.662200939;RBX1|0.676761719;TRIP6|0.680463841;SNRPF|0.692465503;COMMD3-BMI1|0.694229533;TMA7|0.694248013;LUM|0.6985652;MDN1|0.699044067;RPL39|0.70643…	217	16421	562	85180	http://www.ebi.ac.uk/QuickGO/GTerm?id=GO:0010467	[]
4	4	macromolecule metabolic process	GO:0043170	1.34e-26	1.96e-24	-43.29	-10.22	2.23503	-16.2741	AHSG|0.165015314;AFP|0.18609243;ITIH4|0.195366342;SERPINA7|0.30609263;APOA1|0.31876546;SERPINF2|0.324532694;ITIH2|0.337612986;UBE2I|0.344198515;C3|0.394006372;OGN|0.405744036;COL3A1|0.411903132;A2M|0.413020489;SERPINC1|0.416962457;RBM3|0.44702786;FSTL1|0.45386571;KRT10|0.498333434;CCN1|0.499878168;B4DRL9|0.546826669;IGKC|0.551780631;C4A|0.555642373;SREK1|0.563482286;KRT2|0.571880999;DICER1|0.5780…	322	30058	562	85180	http://www.ebi.ac.uk/QuickGO/GTerm?id=GO:0043170	[]
4	4	protein metabolic process	GO:0019538	2.11e-26	3e-24	-30.32	-7.08	2.23503	-16.2741	AHSG|0.165015314;AFP|0.18609243;ITIH4|0.195366342;SERPINA7|0.30609263;APOA1|0.31876546;SERPINF2|0.324532694;ITIH2|0.337612986;UBE2I|0.344198515;C3|0.394006372;COL3A1|0.411903132;A2M|0.413020489;SERPINC1|0.416962457;RBM3|0.44702786;FSTL1|0.45386571;KRT10|0.498333434;CCN1|0.499878168;B4DRL9|0.546826669;IGKC|0.551780631;C4A|0.555642373;KRT2|0.571880999;DICER1|0.578034476;FKBP14|0.614019585;UEVLD|0.6…	214	16126	562	85180	http://www.ebi.ac.uk/QuickGO/GTerm?id=GO:0019538	[]
7	7	cellular protein complex disassembly	GO:0043624	2.69e-26	3.73e-24	-4.4	-0.81	2.23503	-16.2741	TMOD2|0.290984687;B7Z2X4|0.587307156;RPL39|0.706436187;RPS28|0.728473288;MTPN|0.733775741;RPL30|0.75735901;RPL37A|0.762264792;RPL22|0.762752268;RPL38|0.769231504;RPL35A|0.774533243;RPS12|0.775170818;DSTN|0.77562208;RPL34|0.78373684;CFL2|0.785308365;MID1IP1|0.790211093;RPS25|0.794752097;RPS27|0.806228236;RPL36|0.812559553;RPL26|0.812963546;MRPS17|0.814955937;RPS26|0.815287739;MRPL58|0.818244573;FA…	37	524	562	85180	http://www.ebi.ac.uk/QuickGO/GTerm?id=GO:0043624	[]
2	2	positive regulation of biological process	GO:0048518	6.79e-26	9.14e-24	-23.41	-5.41	2.23503	-16.2741	AHSG|0.165015314;APOA1|0.31876546;SERPINF2|0.324532694;UBE2I|0.344198515;C3|0.394006372;COL3A1|0.411903132;A2M|0.413020489;RBM3|0.44702786;MTDH|0.453094976;TBC1D10B|0.465209156;KRT10|0.498333434;CCN1|0.499878168;S100A10|0.549868375;IGKC|0.551780631;C4A|0.555642373;KRT2|0.571880999;DICER1|0.578034476;B7Z2X4|0.587307156;NUCKS1|0.615706656;AFDN|0.618161506;B2M|0.633401502;HMGA1|0.639503882;FABP5|0.6…	165	10778	562	85180	http://www.ebi.ac.uk/QuickGO/GTerm?id=GO:0048518	[]
6	6	amide biosynthetic process	GO:0043604	8.79e-26	1.15e-23	-8.4	-1.78	2.23503	-16.2741	RBM3|0.44702786;CCN1|0.499878168;DICER1|0.578034476;ATP5IF1|0.68560565;TMA7|0.694248013;RPL39|0.706436187;SEC61B|0.709169703;RPS28|0.728473288;MTPN|0.733775741;SRP19|0.743668814;EIF1AX|0.747479114;RPL30|0.75735901;RPL37A|0.762264792;RPL22|0.762752268;EIF3G|0.763677851;RPL38|0.769231504;RPS21|0.773761839;RPL35A|0.774533243;RPS12|0.775170818;RPL34|0.78373684;NCL|0.788878594;RPS25|0.794752097;ITGA2|…	73	2536	562	85180	http://www.ebi.ac.uk/QuickGO/GTerm?id=GO:0043604	[]
2	2	biological regulation	GO:0065007	9e-26	1.15e-23	-50.17	-11.89	2.23503	-16.2741	AHSG|0.165015314;AFP|0.18609243;ITIH4|0.195366342;TMOD2|0.290984687;B4E1V0|0.297587418;AFM|0.301292942;SERPINA7|0.30609263;GC|0.315128902;APOA1|0.31876546;SERPINF2|0.324532694;ITIH2|0.337612986;UBE2I|0.344198515;MT1A|0.349236331;C3|0.394006372;OGN|0.405744036;COL3A1|0.411903132;FGB|0.412311732;A2M|0.413020489;PLG|0.416710346;SERPINC1|0.416962457;RBM3|0.44702786;MTDH|0.453094976;FSTL1|0.45386571;T…	341	33094	562	85180	http://www.ebi.ac.uk/QuickGO/GTerm?id=GO:0065007	[]
2	2	cellular process	GO:0009987	9.43e-26	1.17e-23	-68.31	-16.27	2.23503	-16.2741	AHSG|0.165015314;AFP|0.18609243;ITIH4|0.195366342;TMOD2|0.290984687;SERPINA7|0.30609263;APOA1|0.31876546;SERPINF2|0.324532694;ITIH2|0.337612986;UBE2I|0.344198515;MT1A|0.349236331;DKFZP779G1236|0.388707246;C3|0.394006372;OGN|0.405744036;COL3A1|0.411903132;A2M|0.413020489;RBM3|0.44702786;MTDH|0.453094976;FSTL1|0.45386571;TBC1D10B|0.465209156;KRT9|0.470400915;MT1E|0.485906869;KRT10|0.498333434;CCN1|…	509	62050	562	85180	http://www.ebi.ac.uk/QuickGO/GTerm?id=GO:0009987	[]
8	7,8	RNA splicing	GO:0008380	1.19e-25	1.44e-23	-5.48	-1.08	2.23503	-16.2741	RBM3|0.44702786;SREK1|0.563482286;SF3A2|0.662200939;SNRPF|0.692465503;DDX46|0.719087144;SLU7|0.733660891;ZMAT2|0.73556006;VIRMA|0.737046555;TRA2A|0.757140461;SMNDC1|0.765367076;LSM6|0.770159313;SNRPG|0.770645124;SRSF2|0.773591554;Q53GP2|0.775904428;C2orf49|0.780092967;LSM5|0.783546055;NCL|0.788878594;RBFOX2|0.793675061;SRSF3|0.794282113;SRSF5|0.800727533;BUD31|0.802256724;HSPC148|0.80323452;ZRANB…	46	939	562	85180	http://www.ebi.ac.uk/QuickGO/GTerm?id=GO:0008380	[]
5	4,5	establishment of protein localization	GO:0045184	1.25e-25	1.49e-23	-11.95	-2.64	2.23503	-16.2741	AFM|0.301292942;TBC1D10B|0.465209156;B4DRL9|0.546826669;S100A10|0.549868375;UEVLD|0.616544582;AFDN|0.618161506;VPS37B|0.631454412;DYNLL2|0.679344869;TRIP6|0.680463841;ATP5IF1|0.68560565;RAB30|0.692572099;RPL39|0.706436187;SEC61B|0.709169703;VAMP3|0.712248408;RPS28|0.728473288;SLU7|0.733660891;WFS1|0.735091571;HSPB11|0.73755015;ISG15|0.737647493;SRP19|0.743668814;ENSA|0.7533372;HMGN3|0.756031248;D…	100	4625	562	85180	http://www.ebi.ac.uk/QuickGO/GTerm?id=GO:0045184	[]
6	5,6	negative regulation of gene expression	GO:0010629	2.65e-25	3.07e-23	-9.14	-1.96	2.23503	-16.2741	UBE2I|0.344198515;A2M|0.413020489;RBM3|0.44702786;DICER1|0.578034476;HMGA1|0.639503882;COMMD3-BMI1|0.694229533;RPL39|0.706436187;CBX3|0.718236075;SERPINF1|0.726790191;POLE3|0.726924773;TCF25|0.728049538;RPS28|0.728473288;WFS1|0.735091571;SUPT4H1|0.748180409;DPY30|0.750444942;SAP30BP|0.752678914;RPL30|0.75735901;ABCC2|0.760759038;RPL37A|0.762264792;RPL22|0.762752268;RPL38|0.769231504;LSM6|0.770159…	79	3014	562	85180	http://www.ebi.ac.uk/QuickGO/GTerm?id=GO:0010629	[]
3	3	macromolecule localization	GO:0033036	3.38e-25	3.82e-23	-15.58	-3.52	2.23503	-16.2741	AFM|0.301292942;APOA1|0.31876546;RBP4|0.370003562;C3|0.394006372;TBC1D10B|0.465209156;B4DRL9|0.546826669;S100A10|0.549868375;UEVLD|0.616544582;AFDN|0.618161506;VPS37B|0.631454412;DYNLL2|0.679344869;TRIP6|0.680463841;ATP5IF1|0.68560565;RAB30|0.692572099;RPL39|0.706436187;SEC61B|0.709169703;VAMP3|0.712248408;RPS28|0.728473288;TAX1BP3|0.729364023;SLU7|0.733660891;WFS1|0.735091571;HSPB11|0.73755015;I…	122	6638	562	85180	http://www.ebi.ac.uk/QuickGO/GTerm?id=GO:0033036	[]
6	6	viral life cycle	GO:0019058	4.52e-25	5.01e-23	-4.12	-0.75	2.23503	-16.2741	DICER1|0.578034476;NUCKS1|0.615706656;BST2|0.706116009;RPL39|0.706436187;RPS28|0.728473288;ISG15|0.737647493;BANF1|0.738362322;SUPT4H1|0.748180409;RPL30|0.75735901;RPL37A|0.762264792;RPL22|0.762752268;RPL38|0.769231504;RPL35A|0.774533243;RPS12|0.775170818;RPL34|0.78373684;RPS25|0.794752097;ITGA2|0.795534998;RPS27|0.806228236;LGALS1|0.806278189;DEK|0.809716595;RPL36|0.812559553;RPL26|0.812963546;R…	37	568	562	85180	http://www.ebi.ac.uk/QuickGO/GTerm?id=GO:0019058	[]
4	4	organelle organization	GO:0006996	5.43e-25	5.88e-23	-20.01	-4.59	2.23503	-16.2741	TMOD2|0.290984687;UBE2I|0.344198515;TBC1D10B|0.465209156;KRT9|0.470400915;CALML5|0.519101998;S100A10|0.549868375;KRT2|0.571880999;DICER1|0.578034476;B7Z2X4|0.587307156;NUCKS1|0.615706656;KRT5|0.621125689;F5|0.632416688;HMGA1|0.639503882;NAP1L1|0.642362426;HMGB3|0.648004487;GABARAPL1|0.650717522;RBX1|0.676761719;DYNLL2|0.679344869;ATP5IF1|0.68560565;UQCR10|0.689938003;SNRPF|0.692465503;RAB30|0.692…	152	9623	562	85180	http://www.ebi.ac.uk/QuickGO/GTerm?id=GO:0006996	[]
3	2,3	regulation of biological process	GO:0050789	6.05e-25	6.41e-23	-46.79	-11.07	2.23503	-16.2741	AHSG|0.165015314;AFP|0.18609243;ITIH4|0.195366342;TMOD2|0.290984687;B4E1V0|0.297587418;SERPINA7|0.30609263;APOA1|0.31876546;SERPINF2|0.324532694;ITIH2|0.337612986;UBE2I|0.344198515;MT1A|0.349236331;C3|0.394006372;OGN|0.405744036;COL3A1|0.411903132;A2M|0.413020489;PLG|0.416710346;SERPINC1|0.416962457;RBM3|0.44702786;MTDH|0.453094976;FSTL1|0.45386571;TBC1D10B|0.465209156;MT1E|0.485906869;KRT10|0.49…	325	31090	562	85180	http://www.ebi.ac.uk/QuickGO/GTerm?id=GO:0050789	[]
5	5	macromolecular complex disassembly	GO:0032984	6.82e-25	7.08e-23	-4.68	-0.88	2.23503	-16.2741	TMOD2|0.290984687;B7Z2X4|0.587307156;HMGA1|0.639503882;RPL39|0.706436187;RPS28|0.728473288;MTPN|0.733775741;RPL30|0.75735901;RPL37A|0.762264792;RPL22|0.762752268;RPL38|0.769231504;RPL35A|0.774533243;RPS12|0.775170818;DSTN|0.77562208;RPL34|0.78373684;CFL2|0.785308365;MID1IP1|0.790211093;RPS25|0.794752097;RPS27|0.806228236;RPL36|0.812559553;RPL26|0.812963546;MRPS17|0.814955937;RPS26|0.815287739;MRP…	39	657	562	85180	http://www.ebi.ac.uk/QuickGO/GTerm?id=GO:0032984	[]
4	4	protein localization	GO:0008104	7.24e-25	7.36e-23	-12.97	-2.89	2.23503	-16.2741	AFM|0.301292942;TBC1D10B|0.465209156;B4DRL9|0.546826669;S100A10|0.549868375;UEVLD|0.616544582;AFDN|0.618161506;VPS37B|0.631454412;DYNLL2|0.679344869;TRIP6|0.680463841;ATP5IF1|0.68560565;RAB30|0.692572099;RPL39|0.706436187;SEC61B|0.709169703;VAMP3|0.712248408;RPS28|0.728473288;TAX1BP3|0.729364023;SLU7|0.733660891;WFS1|0.735091571;HSPB11|0.73755015;ISG15|0.737647493;SRP19|0.743668814;ENSA|0.7533372…	110	5603	562	85180	http://www.ebi.ac.uk/QuickGO/GTerm?id=GO:0008104	[]
3	3	response to stress	GO:0006950	1.12e-24	1.12e-22	-23.22	-5.37	2.23503	-16.2741	AHSG|0.165015314;ITIH4|0.195366342;B4E1V0|0.297587418;APOA1|0.31876546;SERPINF2|0.324532694;UBE2I|0.344198515;MT1A|0.349236331;C3|0.394006372;COL3A1|0.411903132;FGB|0.412311732;A2M|0.413020489;PLG|0.416710346;SERPINC1|0.416962457;RBM3|0.44702786;FSTL1|0.45386571;MT1E|0.485906869;CCN1|0.499878168;IGKC|0.551780631;C4A|0.555642373;Q8NCW7|0.574165512;DICER1|0.578034476;NUCKS1|0.615706656;THBS1|0.6222…	143	8774	562	85180	http://www.ebi.ac.uk/QuickGO/GTerm?id=GO:0006950	[]
cellular components
3	3	extracellular vesicle	GO:1903561	5.35e-87	3.01e-84	AHSG|0.165015314;ITIH4|0.195366342;AFM|0.301292942;SERPINA7|0.30609263;GC|0.315128902;C3|0.394006372;OGN|0.405744036;A2M|0.413020489;FSTL1|0.45386571;KRT9|0.470400915;KRT10|0.498333434;CALML5|0.519101998;S100A10|0.549868375;IGKC|0.551780631;KRT2|0.571880999;DICER1|0.578034476;ATP5MD|0.587005951;UEVLD|0.616544582;KRT5|0.621125689;F5|0.632416688;B2M|0.633401502;DCD|0.635067998;FABP5|0.644041386;LYZ…	149	2843	605	90438	http://www.ebi.ac.uk/QuickGO/GTerm?id=GO:1903561
3	3	extracellular organelle	GO:0043230	7.16e-87	3.01e-84	AHSG|0.165015314;ITIH4|0.195366342;AFM|0.301292942;SERPINA7|0.30609263;GC|0.315128902;C3|0.394006372;OGN|0.405744036;A2M|0.413020489;FSTL1|0.45386571;KRT9|0.470400915;KRT10|0.498333434;CALML5|0.519101998;S100A10|0.549868375;IGKC|0.551780631;KRT2|0.571880999;DICER1|0.578034476;ATP5MD|0.587005951;UEVLD|0.616544582;KRT5|0.621125689;F5|0.632416688;B2M|0.633401502;DCD|0.635067998;FABP5|0.644041386;LYZ…	149	2849	605	90438	http://www.ebi.ac.uk/QuickGO/GTerm?id=GO:0043230
4	4	extracellular exosome	GO:0070062	2.15e-85	5.63e-83	AHSG|0.165015314;ITIH4|0.195366342;AFM|0.301292942;SERPINA7|0.30609263;GC|0.315128902;C3|0.394006372;OGN|0.405744036;A2M|0.413020489;FSTL1|0.45386571;KRT9|0.470400915;KRT10|0.498333434;CALML5|0.519101998;S100A10|0.549868375;IGKC|0.551780631;KRT2|0.571880999;DICER1|0.578034476;ATP5MD|0.587005951;UEVLD|0.616544582;KRT5|0.621125689;B2M|0.633401502;DCD|0.635067998;FABP5|0.644041386;LYZ|0.665935809;GN…	147	2822	605	90438	http://www.ebi.ac.uk/QuickGO/GTerm?id=GO:0070062
4	4	extracellular membrane-bounded organelle	GO:0065010	2.68e-85	5.63e-83	AHSG|0.165015314;ITIH4|0.195366342;AFM|0.301292942;SERPINA7|0.30609263;GC|0.315128902;C3|0.394006372;OGN|0.405744036;A2M|0.413020489;FSTL1|0.45386571;KRT9|0.470400915;KRT10|0.498333434;CALML5|0.519101998;S100A10|0.549868375;IGKC|0.551780631;KRT2|0.571880999;ATP5MD|0.587005951;UEVLD|0.616544582;KRT5|0.621125689;B2M|0.633401502;DCD|0.635067998;FABP5|0.644041386;LYZ|0.665935809;GNG12|0.671393986;UQC…	146	2778	605	90438	http://www.ebi.ac.uk/QuickGO/GTerm?id=GO:0065010
5	5	membrane-bounded vesicle	GO:0031988	2.23e-74	3.76e-72	AHSG|0.165015314;ITIH4|0.195366342;AFM|0.301292942;SERPINA7|0.30609263;GC|0.315128902;C3|0.394006372;OGN|0.405744036;A2M|0.413020489;FSTL1|0.45386571;KRT9|0.470400915;KRT10|0.498333434;CALML5|0.519101998;S100A10|0.549868375;IGKC|0.551780631;KRT2|0.571880999;ATP5MD|0.587005951;UEVLD|0.616544582;KRT5|0.621125689;F5|0.632416688;B2M|0.633401502;DCD|0.635067998;FABP5|0.644041386;LYZ|0.665935809;GNG12|…	161	4218	605	90438	http://www.ebi.ac.uk/QuickGO/GTerm?id=GO:0031988
3	3	intracellular part	GO:0044424	1.21e-68	1.58e-66	AHSG|0.165015314;AFP|0.18609243;ITIH4|0.195366342;Q14476|0.282965938;TMOD2|0.290984687;ALB|0.301024238;AFM|0.301292942;GC|0.315128902;UBE2I|0.344198515;NOLC1|0.34723946;HBA2|0.347696974;MT1A|0.349236331;C3|0.394006372;OGN|0.405744036;COL3A1|0.411903132;FGB|0.412311732;A2M|0.413020489;RBM3|0.44702786;MTDH|0.453094976;FSTL1|0.45386571;KRT1|0.464402901;TBC1D10B|0.465209156;KRT9|0.470400915;MT1E|0.48…	526	48655	605	90438	http://www.ebi.ac.uk/QuickGO/GTerm?id=GO:0044424
2	2	extracellular region part	GO:0044421	1.31e-68	1.58e-66	AHSG|0.165015314;AFP|0.18609243;ITIH4|0.195366342;B4DI57|0.251393944;ALB|0.301024238;AFM|0.301292942;SERPINA7|0.30609263;GC|0.315128902;APOA1|0.31876546;SERPINF2|0.324532694;B7Z4X6|0.385752158;C3|0.394006372;OGN|0.405744036;COL3A1|0.411903132;A2M|0.413020489;SERPINC1|0.416962457;FSTL1|0.45386571;KRT9|0.470400915;KRT10|0.498333434;CCN1|0.499878168;CALML5|0.519101998;S100A10|0.549868375;IGKC|0.5517…	175	5566	605	90438	http://www.ebi.ac.uk/QuickGO/GTerm?id=GO:0044421
4	4	vesicle	GO:0031982	2.89e-65	3.04e-63	AHSG|0.165015314;ITIH4|0.195366342;AFM|0.301292942;SERPINA7|0.30609263;GC|0.315128902;C3|0.394006372;OGN|0.405744036;A2M|0.413020489;FSTL1|0.45386571;KRT9|0.470400915;KRT10|0.498333434;CALML5|0.519101998;S100A10|0.549868375;IGKC|0.551780631;KRT2|0.571880999;DICER1|0.578034476;ATP5MD|0.587005951;UEVLD|0.616544582;KRT5|0.621125689;VPS37B|0.631454412;F5|0.632416688;B2M|0.633401502;DCD|0.635067998;FA…	169	5440	605	90438	http://www.ebi.ac.uk/QuickGO/GTerm?id=GO:0031982
5	4,5	intracellular organelle lumen	GO:0070013	3.84e-63	3.08e-61	AHSG|0.165015314;AFP|0.18609243;ITIH4|0.195366342;GC|0.315128902;UBE2I|0.344198515;NOLC1|0.34723946;C3|0.394006372;OGN|0.405744036;COL3A1|0.411903132;A2M|0.413020489;RBM3|0.44702786;FSTL1|0.45386571;CCN1|0.499878168;CALML5|0.519101998;SREK1|0.563482286;FAM32A|0.565128618;NUCKS1|0.615706656;AFDN|0.618161506;F5|0.632416688;B2M|0.633401502;HMGA1|0.639503882;FABP5|0.644041386;FDXR|0.647755396;SF3A2|0…	247	12094	605	90438	http://www.ebi.ac.uk/QuickGO/GTerm?id=GO:0070013
3	3	organelle lumen	GO:0043233	3.84e-63	3.08e-61	AHSG|0.165015314;AFP|0.18609243;ITIH4|0.195366342;GC|0.315128902;UBE2I|0.344198515;NOLC1|0.34723946;C3|0.394006372;OGN|0.405744036;COL3A1|0.411903132;A2M|0.413020489;RBM3|0.44702786;FSTL1|0.45386571;CCN1|0.499878168;CALML5|0.519101998;SREK1|0.563482286;FAM32A|0.565128618;NUCKS1|0.615706656;AFDN|0.618161506;F5|0.632416688;B2M|0.633401502;HMGA1|0.639503882;FABP5|0.644041386;FDXR|0.647755396;SF3A2|0…	247	12094	605	90438	http://www.ebi.ac.uk/QuickGO/GTerm?id=GO:0043233
2	2	membrane-enclosed lumen	GO:0031974	4.03e-63	3.08e-61	AHSG|0.165015314;AFP|0.18609243;ITIH4|0.195366342;GC|0.315128902;UBE2I|0.344198515;NOLC1|0.34723946;C3|0.394006372;OGN|0.405744036;COL3A1|0.411903132;A2M|0.413020489;RBM3|0.44702786;FSTL1|0.45386571;CCN1|0.499878168;CALML5|0.519101998;SREK1|0.563482286;FAM32A|0.565128618;NUCKS1|0.615706656;AFDN|0.618161506;F5|0.632416688;B2M|0.633401502;HMGA1|0.639503882;FABP5|0.644041386;FDXR|0.647755396;SF3A2|0…	247	12097	605	90438	http://www.ebi.ac.uk/QuickGO/GTerm?id=GO:0031974
2	2	extracellular region	GO:0005576	6.53e-61	4.57e-59	AHSG|0.165015314;AFP|0.18609243;ITIH4|0.195366342;B4DI57|0.251393944;B4E1V0|0.297587418;ALB|0.301024238;AFM|0.301292942;SERPINA7|0.30609263;GC|0.315128902;APOA1|0.31876546;SERPINF2|0.324532694;B3KPF0|0.32842872;RBP4|0.370003562;B7Z4X6|0.385752158;C3|0.394006372;OGN|0.405744036;COL3A1|0.411903132;A2M|0.413020489;PLG|0.416710346;SERPINC1|0.416962457;B4DN75|0.438386755;FSTL1|0.45386571;KRT9|0.470400…	191	7506	605	90438	http://www.ebi.ac.uk/QuickGO/GTerm?id=GO:0005576
6	5,6	cytosol	GO:0005829	3.05e-60	1.97e-58	AFP|0.18609243;Q14476|0.282965938;GC|0.315128902;UBE2I|0.344198515;HBA2|0.347696974;MT1A|0.349236331;A2M|0.413020489;TBC1D10B|0.465209156;KRT9|0.470400915;KRT10|0.498333434;B3VL31|0.534319061;KRT2|0.571880999;DICER1|0.578034476;AFDN|0.618161506;KRT5|0.621125689;B2M|0.633401502;MT2A|0.634446222;SCYL1|0.635710458;HMGA1|0.639503882;FABP5|0.644041386;GABARAPL1|0.650717522;GON7|0.668072982;RBX1|0.6767…	210	9154	605	90438	http://www.ebi.ac.uk/QuickGO/GTerm?id=GO:0005829
4	4	cytoplasm	GO:0005737	7.01e-60	4.21e-58	AHSG|0.165015314;AFP|0.18609243;ITIH4|0.195366342;Q14476|0.282965938;TMOD2|0.290984687;ALB|0.301024238;AFM|0.301292942;GC|0.315128902;UBE2I|0.344198515;HBA2|0.347696974;MT1A|0.349236331;C3|0.394006372;OGN|0.405744036;COL3A1|0.411903132;FGB|0.412311732;A2M|0.413020489;RBM3|0.44702786;MTDH|0.453094976;FSTL1|0.45386571;TBC1D10B|0.465209156;KRT9|0.470400915;MT1E|0.485906869;KRT10|0.498333434;CCN1|0.4…	428	34454	605	90438	http://www.ebi.ac.uk/QuickGO/GTerm?id=GO:0005737
3	3	intracellular	GO:0005622	1.06e-59	5.93e-58	AHSG|0.165015314;AFP|0.18609243;ITIH4|0.195366342;Q14476|0.282965938;TMOD2|0.290984687;ALB|0.301024238;AFM|0.301292942;GC|0.315128902;UBE2I|0.344198515;NOLC1|0.34723946;HBA2|0.347696974;MT1A|0.349236331;C3|0.394006372;OGN|0.405744036;COL3A1|0.411903132;FGB|0.412311732;A2M|0.413020489;RBM3|0.44702786;MTDH|0.453094976;FSTL1|0.45386571;KRT1|0.464402901;TBC1D10B|0.465209156;KRT9|0.470400915;MT1E|0.48…	533	52425	605	90438	http://www.ebi.ac.uk/QuickGO/GTerm?id=GO:0005622
3	3	extracellular space	GO:0005615	8.58e-55	4.51e-53	AHSG|0.165015314;AFP|0.18609243;ITIH4|0.195366342;B4DI57|0.251393944;ALB|0.301024238;AFM|0.301292942;SERPINA7|0.30609263;GC|0.315128902;APOA1|0.31876546;SERPINF2|0.324532694;B7Z4X6|0.385752158;C3|0.394006372;OGN|0.405744036;COL3A1|0.411903132;A2M|0.413020489;SERPINC1|0.416962457;FSTL1|0.45386571;KRT9|0.470400915;KRT10|0.498333434;CCN1|0.499878168;S100A10|0.549868375;IGKC|0.551780631;C4A|0.5556423…	140	4370	605	90438	http://www.ebi.ac.uk/QuickGO/GTerm?id=GO:0005615
2	2	organelle	GO:0043226	2.28e-52	1.13e-50	AHSG|0.165015314;AFP|0.18609243;ITIH4|0.195366342;TMOD2|0.290984687;ALB|0.301024238;AFM|0.301292942;SERPINA7|0.30609263;GC|0.315128902;UBE2I|0.344198515;NOLC1|0.34723946;MT1A|0.349236331;C3|0.394006372;OGN|0.405744036;COL3A1|0.411903132;FGB|0.412311732;A2M|0.413020489;RBM3|0.44702786;MTDH|0.453094976;FSTL1|0.45386571;KRT1|0.464402901;KRT9|0.470400915;MT1E|0.485906869;KRT10|0.498333434;CCN1|0.4998…	474	43686	605	90438	http://www.ebi.ac.uk/QuickGO/GTerm?id=GO:0043226
5	4,5	cytoplasmic part	GO:0044444	3.93e-51	1.84e-49	AHSG|0.165015314;AFP|0.18609243;ITIH4|0.195366342;Q14476|0.282965938;TMOD2|0.290984687;ALB|0.301024238;GC|0.315128902;UBE2I|0.344198515;HBA2|0.347696974;MT1A|0.349236331;C3|0.394006372;OGN|0.405744036;COL3A1|0.411903132;FGB|0.412311732;A2M|0.413020489;RBM3|0.44702786;MTDH|0.453094976;FSTL1|0.45386571;TBC1D10B|0.465209156;KRT9|0.470400915;MT1E|0.485906869;KRT10|0.498333434;CCN1|0.499878168;CALML5|…	377	29429	605	90438	http://www.ebi.ac.uk/QuickGO/GTerm?id=GO:0044444
4	3,4	intracellular organelle part	GO:0044446	7.53e-49	3.33e-47	AHSG|0.165015314;AFP|0.18609243;ITIH4|0.195366342;TMOD2|0.290984687;GC|0.315128902;UBE2I|0.344198515;NOLC1|0.34723946;C3|0.394006372;OGN|0.405744036;COL3A1|0.411903132;A2M|0.413020489;RBM3|0.44702786;FSTL1|0.45386571;KRT1|0.464402901;KRT9|0.470400915;KRT10|0.498333434;CCN1|0.499878168;CALML5|0.519101998;SREK1|0.563482286;FAM32A|0.565128618;KRT2|0.571880999;DICER1|0.578034476;ATP5MD|0.587005951;FK…	365	28391	605	90438	http://www.ebi.ac.uk/QuickGO/GTerm?id=GO:0044446
3	3	membrane-bounded organelle	GO:0043227	1.67e-48	7.01e-47	AHSG|0.165015314;AFP|0.18609243;ITIH4|0.195366342;ALB|0.301024238;AFM|0.301292942;SERPINA7|0.30609263;GC|0.315128902;UBE2I|0.344198515;NOLC1|0.34723946;MT1A|0.349236331;C3|0.394006372;OGN|0.405744036;COL3A1|0.411903132;FGB|0.412311732;A2M|0.413020489;RBM3|0.44702786;MTDH|0.453094976;FSTL1|0.45386571;KRT9|0.470400915;MT1E|0.485906869;KRT10|0.498333434;CCN1|0.499878168;CALML5|0.519101998;S100A10|0.…	439	39139	605	90438	http://www.ebi.ac.uk/QuickGO/GTerm?id=GO:0043227
2	2	organelle part	GO:0044422	2.79e-48	1.12e-46	AHSG|0.165015314;AFP|0.18609243;ITIH4|0.195366342;TMOD2|0.290984687;GC|0.315128902;UBE2I|0.344198515;NOLC1|0.34723946;C3|0.394006372;OGN|0.405744036;COL3A1|0.411903132;A2M|0.413020489;RBM3|0.44702786;FSTL1|0.45386571;KRT1|0.464402901;KRT9|0.470400915;KRT10|0.498333434;CCN1|0.499878168;CALML5|0.519101998;SREK1|0.563482286;FAM32A|0.565128618;KRT2|0.571880999;DICER1|0.578034476;ATP5MD|0.587005951;FK…	368	28938	605	90438	http://www.ebi.ac.uk/QuickGO/GTerm?id=GO:0044422
4	3,4	intracellular organelle	GO:0043229	3.49e-47	1.33e-45	AHSG|0.165015314;AFP|0.18609243;ITIH4|0.195366342;TMOD2|0.290984687;ALB|0.301024238;GC|0.315128902;UBE2I|0.344198515;NOLC1|0.34723946;MT1A|0.349236331;C3|0.394006372;OGN|0.405744036;COL3A1|0.411903132;FGB|0.412311732;A2M|0.413020489;RBM3|0.44702786;MTDH|0.453094976;FSTL1|0.45386571;KRT1|0.464402901;KRT9|0.470400915;MT1E|0.485906869;KRT10|0.498333434;CCN1|0.499878168;CALML5|0.519101998;S100A10|0.5…	457	42383	605	90438	http://www.ebi.ac.uk/QuickGO/GTerm?id=GO:0043229
5	4,5	nuclear part	GO:0044428	1.08e-45	3.94e-44	UBE2I|0.344198515;NOLC1|0.34723946;RBM3|0.44702786;SREK1|0.563482286;FAM32A|0.565128618;DICER1|0.578034476;NUCKS1|0.615706656;AFDN|0.618161506;HMGA1|0.639503882;FABP5|0.644041386;SF3A2|0.662200939;PTTG1IP|0.667974551;GON7|0.668072982;RBX1|0.676761719;SNRPF|0.692465503;TRAPPC2|0.69380674;COMMD3-BMI1|0.694229533;OLR1|0.694369506;MDN1|0.699044067;RBBP9|0.704086418;COPS7B|0.713526154;EPPK1|0.71356242…	218	12031	605	90438	http://www.ebi.ac.uk/QuickGO/GTerm?id=GO:0044428
6	5,6	nucleus	GO:0005634	9.58e-44	3.36e-42	UBE2I|0.344198515;NOLC1|0.34723946;MT1A|0.349236331;RBM3|0.44702786;KRT9|0.470400915;MT1E|0.485906869;KRT10|0.498333434;CALML5|0.519101998;SREK1|0.563482286;FAM32A|0.565128618;KRT2|0.571880999;DICER1|0.578034476;ESS2|0.58387695;NUCKS1|0.615706656;AFDN|0.618161506;KRT5|0.621125689;MT2A|0.634446222;HMGA1|0.639503882;NAP1L1|0.642362426;FABP5|0.644041386;HMGB3|0.648004487;HMGN4|0.655886276;SF3A2|0.66…	286	19757	605	90438	http://www.ebi.ac.uk/QuickGO/GTerm?id=GO:0005634
5	4,5	intracellular non-membrane-bounded organelle	GO:0043232	2.69e-42	9.04e-41	TMOD2|0.290984687;UBE2I|0.344198515;NOLC1|0.34723946;RBM3|0.44702786;KRT1|0.464402901;KRT9|0.470400915;KRT10|0.498333434;KRT2|0.571880999;NUCKS1|0.615706656;KRT5|0.621125689;HMGA1|0.639503882;FABP5|0.644041386;HMGN4|0.655886276;B2RA03|0.657448349;GON7|0.668072982;GNG12|0.671393986;TANC1|0.677323287;DYNLL2|0.679344869;TRIP6|0.680463841;MYL9|0.690808076;KRT14|0.698836609;MDN1|0.699044067;BRK1|0.701…	202	11052	605	90438	http://www.ebi.ac.uk/QuickGO/GTerm?id=GO:0043232
3	3	non-membrane-bounded organelle	GO:0043228	2.91e-42	9.42e-41	TMOD2|0.290984687;UBE2I|0.344198515;NOLC1|0.34723946;RBM3|0.44702786;KRT1|0.464402901;KRT9|0.470400915;KRT10|0.498333434;KRT2|0.571880999;NUCKS1|0.615706656;KRT5|0.621125689;HMGA1|0.639503882;FABP5|0.644041386;HMGN4|0.655886276;B2RA03|0.657448349;GON7|0.668072982;GNG12|0.671393986;TANC1|0.677323287;DYNLL2|0.679344869;TRIP6|0.680463841;MYL9|0.690808076;KRT14|0.698836609;MDN1|0.699044067;BRK1|0.701…	202	11058	605	90438	http://www.ebi.ac.uk/QuickGO/GTerm?id=GO:0043228
6	5,6	nuclear lumen	GO:0031981	4.88e-41	1.52e-39	UBE2I|0.344198515;NOLC1|0.34723946;RBM3|0.44702786;SREK1|0.563482286;FAM32A|0.565128618;NUCKS1|0.615706656;AFDN|0.618161506;HMGA1|0.639503882;FABP5|0.644041386;SF3A2|0.662200939;PTTG1IP|0.667974551;GON7|0.668072982;RBX1|0.676761719;SNRPF|0.692465503;TRAPPC2|0.69380674;COMMD3-BMI1|0.694229533;OLR1|0.694369506;MDN1|0.699044067;RBBP9|0.704086418;COPS7B|0.713526154;EPPK1|0.713562423;CBX3|0.718236075;…	197	10785	605	90438	http://www.ebi.ac.uk/QuickGO/GTerm?id=GO:0031981
5	4,5	intracellular membrane-bounded organelle	GO:0043231	3.08e-39	9.25e-38	AHSG|0.165015314;AFP|0.18609243;ITIH4|0.195366342;ALB|0.301024238;GC|0.315128902;UBE2I|0.344198515;NOLC1|0.34723946;MT1A|0.349236331;C3|0.394006372;OGN|0.405744036;COL3A1|0.411903132;FGB|0.412311732;A2M|0.413020489;RBM3|0.44702786;MTDH|0.453094976;FSTL1|0.45386571;KRT9|0.470400915;MT1E|0.485906869;KRT10|0.498333434;CCN1|0.499878168;CALML5|0.519101998;S100A10|0.549868375;SREK1|0.563482286;FAM32A|0…	412	37789	605	90438	http://www.ebi.ac.uk/QuickGO/GTerm?id=GO:0043231
3	3	ribonucleoprotein complex	GO:1990904	2.65e-38	7.69e-37	RBM3|0.44702786;SREK1|0.563482286;DICER1|0.578034476;SF3A2|0.662200939;SNRPF|0.692465503;MDN1|0.699044067;RPL39|0.706436187;RPS28|0.728473288;SLU7|0.733660891;ZMAT2|0.73556006;PTGES3|0.740596409;SRP19|0.743668814;TRA2A|0.757140461;RPL30|0.75735901;TMA16|0.758287323;RPL37A|0.762264792;RPL22|0.762752268;SMNDC1|0.765367076;RPL38|0.769231504;MRPL38|0.769380478;LSM6|0.770159313;SNRPG|0.770645124;RPS21…	82	2050	605	90438	http://www.ebi.ac.uk/QuickGO/GTerm?id=GO:1990904
6	5,6	nucleoplasm	GO:0005654	1.6e-35	4.48e-34	UBE2I|0.344198515;NOLC1|0.34723946;RBM3|0.44702786;SREK1|0.563482286;FAM32A|0.565128618;NUCKS1|0.615706656;AFDN|0.618161506;HMGA1|0.639503882;FABP5|0.644041386;SF3A2|0.662200939;PTTG1IP|0.667974551;GON7|0.668072982;RBX1|0.676761719;SNRPF|0.692465503;TRAPPC2|0.69380674;COMMD3-BMI1|0.694229533;OLR1|0.694369506;MDN1|0.699044067;RBBP9|0.704086418;COPS7B|0.713526154;CBX3|0.718236075;DDX46|0.719087144;…	168	8973	605	90438	http://www.ebi.ac.uk/QuickGO/GTerm?id=GO:0005654
4	4	intracellular ribonucleoprotein complex	GO:0030529	2.86e-35	7.76e-34	RBM3|0.44702786;SREK1|0.563482286;DICER1|0.578034476;SF3A2|0.662200939;SNRPF|0.692465503;MDN1|0.699044067;RPL39|0.706436187;RPS28|0.728473288;SLU7|0.733660891;ZMAT2|0.73556006;PTGES3|0.740596409;SRP19|0.743668814;RPL30|0.75735901;TMA16|0.758287323;RPL37A|0.762264792;RPL22|0.762752268;SMNDC1|0.765367076;RPL38|0.769231504;MRPL38|0.769380478;LSM6|0.770159313;SNRPG|0.770645124;RPS21|0.773761839;RPL35…	79	2086	605	90438	http://www.ebi.ac.uk/QuickGO/GTerm?id=GO:0030529
5	5	secretory granule lumen	GO:0034774	2.47e-21	6.48e-20	AHSG|0.165015314;ITIH4|0.195366342;C3|0.394006372;A2M|0.413020489;F5|0.632416688;B2M|0.633401502;FABP5|0.644041386;LYZ|0.665935809;TIMP3|0.735801776;TMSB4X|0.757648484;MIF|0.771884378;COTL1|0.773319625;S100A11|0.807369127;CDA|0.831896582;FTL|1.207449638;HSPA8|1.210908698;PSMD14|1.233584486;OLA1|1.235484448;S100P|1.240300943;CCT8|1.242376167;XRCC6|1.242593258;ACLY|1.246554751;SCCPDH|1.265046498;HS…	27	321	605	90438	http://www.ebi.ac.uk/QuickGO/GTerm?id=GO:0034774
6	5,6	cytoplasmic membrane-bounded vesicle lumen	GO:0060205	8.78e-21	2.24e-19	AHSG|0.165015314;ITIH4|0.195366342;C3|0.394006372;A2M|0.413020489;F5|0.632416688;B2M|0.633401502;FABP5|0.644041386;LYZ|0.665935809;TIMP3|0.735801776;TMSB4X|0.757648484;MIF|0.771884378;COTL1|0.773319625;S100A11|0.807369127;CDA|0.831896582;FTL|1.207449638;HSPA8|1.210908698;PSMD14|1.233584486;OLA1|1.235484448;S100P|1.240300943;CCT8|1.242376167;XRCC6|1.242593258;ACLY|1.246554751;SCCPDH|1.265046498;HS…	27	337	605	90438	http://www.ebi.ac.uk/QuickGO/GTerm?id=GO:0060205
5	4,5	vesicle lumen	GO:0031983	9.48e-21	2.35e-19	AHSG|0.165015314;ITIH4|0.195366342;C3|0.394006372;A2M|0.413020489;F5|0.632416688;B2M|0.633401502;FABP5|0.644041386;LYZ|0.665935809;TIMP3|0.735801776;TMSB4X|0.757648484;MIF|0.771884378;COTL1|0.773319625;S100A11|0.807369127;CDA|0.831896582;FTL|1.207449638;HSPA8|1.210908698;PSMD14|1.233584486;OLA1|1.235484448;S100P|1.240300943;CCT8|1.242376167;XRCC6|1.242593258;ACLY|1.246554751;SCCPDH|1.265046498;HS…	27	338	605	90438	http://www.ebi.ac.uk/QuickGO/GTerm?id=GO:0031983
3	3	endomembrane system	GO:0012505	1.59e-20	3.83e-19	AHSG|0.165015314;AFP|0.18609243;ITIH4|0.195366342;ALB|0.301024238;UBE2I|0.344198515;C3|0.394006372;OGN|0.405744036;COL3A1|0.411903132;FGB|0.412311732;A2M|0.413020489;MTDH|0.453094976;FSTL1|0.45386571;TBC1D10B|0.465209156;CCN1|0.499878168;CALML5|0.519101998;S100A10|0.549868375;KRT2|0.571880999;FKBP14|0.614019585;VPS37B|0.631454412;F5|0.632416688;B2M|0.633401502;FABP5|0.644041386;CDIPT|0.659287393;…	134	8602	605	90438	http://www.ebi.ac.uk/QuickGO/GTerm?id=GO:0012505
8	6,7,8	cytosolic ribosome	GO:0022626	2.26e-20	5.27e-19	RPL39|0.706436187;RPS28|0.728473288;RPL30|0.75735901;RPL37A|0.762264792;RPL22|0.762752268;RPL38|0.769231504;RPL35A|0.774533243;RPS12|0.775170818;RPL34|0.78373684;RPS25|0.794752097;RPS27|0.806228236;RPL36|0.812559553;RPL26|0.812963546;RPS26|0.815287739;FAU|0.824244219;RPLP2|0.825870804;RPL36A|0.828686725;RACK1|1.200203431;RPL7|1.222072052;RPS2|1.238051864;RPL4|1.331321824	21	170	605	90438	http://www.ebi.ac.uk/QuickGO/GTerm?id=GO:0022626
6	5,6	nucleolus	GO:0005730	4.17e-18	9.49e-17	UBE2I|0.344198515;NOLC1|0.34723946;RBM3|0.44702786;NUCKS1|0.615706656;GON7|0.668072982;MDN1|0.699044067;RBBP9|0.704086418;DDX46|0.719087144;TAX1BP3|0.729364023;SRP19|0.743668814;LLPH|0.744323759;TRA2A|0.757140461;TMA16|0.758287323;LSM6|0.770159313;SUB1|0.775269558;PSAP|0.777162465;LYAR|0.779784643;TBCA|0.782538807;RPL34|0.78373684;PFDN2|0.787840183;RBIS|0.788859982;NCL|0.788878594;RPS25|0.7947520…	57	2174	605	90438	http://www.ebi.ac.uk/QuickGO/GTerm?id=GO:0005730
7	5,6,7	cytosolic part	GO:0044445	5.84e-18	1.26e-16	Q14476|0.282965938;HBA2|0.347696974;B3VL31|0.534319061;RPL39|0.706436187;RPS28|0.728473288;RPL30|0.75735901;RPL37A|0.762264792;RPL22|0.762752268;RPL38|0.769231504;RPL35A|0.774533243;RPS12|0.775170818;HPS6|0.780226665;RPL34|0.78373684;RPS25|0.794752097;RPS27|0.806228236;RPL36|0.812559553;RPL26|0.812963546;RPS26|0.815287739;FAU|0.824244219;RPLP2|0.825870804;RPL36A|0.828686725;RACK1|1.200203431;HSPA…	30	563	605	90438	http://www.ebi.ac.uk/QuickGO/GTerm?id=GO:0044445
6	5,6	ribosome	GO:0005840	5.87e-18	1.26e-16	RBM3|0.44702786;RPL39|0.706436187;RPS28|0.728473288;RPL30|0.75735901;TMA16|0.758287323;RPL37A|0.762264792;RPL22|0.762752268;RPL38|0.769231504;MRPL38|0.769380478;RPS21|0.773761839;RPL35A|0.774533243;RPS12|0.775170818;NDUFAB1|0.781446025;RPL34|0.78373684;RPS25|0.794752097;B2R4C1|0.79648282;Q59GX9|0.800641786;Q7Z612|0.804574148;MRPS23|0.805970013;RPS27|0.806228236;RPS29|0.80722528;RPL36|0.812559553;…	39	1022	605	90438	http://www.ebi.ac.uk/QuickGO/GTerm?id=GO:0005840
6	5,6	spliceosomal complex	GO:0005681	2.64e-17	5.54e-16	RBM3|0.44702786;SREK1|0.563482286;SF3A2|0.662200939;SNRPF|0.692465503;SLU7|0.733660891;ZMAT2|0.73556006;TRA2A|0.757140461;SMNDC1|0.765367076;LSM6|0.770159313;SNRPG|0.770645124;LSM5|0.783546055;NCL|0.788878594;BUD31|0.802256724;HSPC148|0.80323452;PTBP2|0.805986076;SNRPD2|0.814523161;LSM2|0.823606722;PPP1R8|0.827042517;A8K7V1|1.200056683;HSPA8|1.210908698;PRPF40A|1.237578798;ISY1|1.242486003;YJU2|1…	24	342	605	90438	http://www.ebi.ac.uk/QuickGO/GTerm?id=GO:0005681
2	2	cell part	GO:0044464	7.62e-17	1.56e-15	AHSG|0.165015314;AFP|0.18609243;ITIH4|0.195366342;Q14476|0.282965938;TMOD2|0.290984687;ALB|0.301024238;AFM|0.301292942;GC|0.315128902;UBE2I|0.344198515;NOLC1|0.34723946;HBA2|0.347696974;MT1A|0.349236331;DKFZP779G1236|0.388707246;C3|0.394006372;OGN|0.405744036;COL3A1|0.411903132;FGB|0.412311732;A2M|0.413020489;C9|0.440300774;RBM3|0.44702786;MTDH|0.453094976;FSTL1|0.45386571;KRT1|0.464402901;TBC1D1…	549	70566	605	90438	http://www.ebi.ac.uk/QuickGO/GTerm?id=GO:0044464
2	2	cell	GO:0005623	1.14e-16	2.27e-15	AHSG|0.165015314;AFP|0.18609243;ITIH4|0.195366342;Q14476|0.282965938;TMOD2|0.290984687;ALB|0.301024238;AFM|0.301292942;GC|0.315128902;UBE2I|0.344198515;NOLC1|0.34723946;HBA2|0.347696974;MT1A|0.349236331;DKFZP779G1236|0.388707246;C3|0.394006372;OGN|0.405744036;COL3A1|0.411903132;FGB|0.412311732;A2M|0.413020489;C9|0.440300774;RBM3|0.44702786;MTDH|0.453094976;FSTL1|0.45386571;KRT1|0.464402901;TBC1D1…	551	71054	605	90438	http://www.ebi.ac.uk/QuickGO/GTerm?id=GO:0005623
5	4,5	ribosomal subunit	GO:0044391	1.22e-16	2.39e-15	RBM3|0.44702786;RPL39|0.706436187;RPS28|0.728473288;RPL30|0.75735901;RPL37A|0.762264792;RPL22|0.762752268;RPL38|0.769231504;RPL35A|0.774533243;RPS12|0.775170818;NDUFAB1|0.781446025;RPL34|0.78373684;RPS25|0.794752097;RPS27|0.806228236;RPL36|0.812559553;RPL26|0.812963546;MRPS17|0.814955937;RPS26|0.815287739;FAU|0.824244219;RPLP2|0.825870804;RPL36A|0.828686725;RACK1|1.200203431;RPL7|1.222072052;RPS2…	24	366	605	90438	http://www.ebi.ac.uk/QuickGO/GTerm?id=GO:0044391
6	5,6	endoplasmic reticulum lumen	GO:0005788	1.51e-16	2.85e-15	AHSG|0.165015314;AFP|0.18609243;C3|0.394006372;COL3A1|0.411903132;FSTL1|0.45386571;CCN1|0.499878168;F5|0.632416688;B2M|0.633401502;FKBP7|0.672110037;MYDGF|0.735062962;WFS1|0.735091571;CST3|0.740573232;VCPIP1|0.780699511;SELENOF|0.796936148;LGALS1|0.806278189;PCSK9|0.82186544;EDEM3|1.200160327;COLGALT1|1.204733735;ERP29|1.211052285;ASPH|1.237458294;P4HB|1.25369623;CANX|1.264812414;HSPA5|1.279256907	23	331	605	90438	http://www.ebi.ac.uk/QuickGO/GTerm?id=GO:0005788
6	6	secretory vesicle	GO:0099503	1.52e-16	2.85e-15	AHSG|0.165015314;ITIH4|0.195366342;C3|0.394006372;A2M|0.413020489;CALML5|0.519101998;F5|0.632416688;B2M|0.633401502;FABP5|0.644041386;LYZ|0.665935809;BST2|0.706116009;VAMP3|0.712248408;WFS1|0.735091571;TIMP3|0.735801776;SYPL1|0.738011955;CST3|0.740573232;DYNLL1|0.756626393;TMSB4X|0.757648484;TMEM30A|0.769223012;MIF|0.771884378;COTL1|0.773319625;PSAP|0.777162465;YPEL5|0.795971359;S100A11|0.8073691…	41	1250	605	90438	http://www.ebi.ac.uk/QuickGO/GTerm?id=GO:0099503
4	4	secretory granule	GO:0030141	1.58e-16	2.89e-15	AHSG|0.165015314;ITIH4|0.195366342;C3|0.394006372;A2M|0.413020489;CALML5|0.519101998;F5|0.632416688;B2M|0.633401502;FABP5|0.644041386;LYZ|0.665935809;BST2|0.706116009;VAMP3|0.712248408;TIMP3|0.735801776;CST3|0.740573232;DYNLL1|0.756626393;TMSB4X|0.757648484;TMEM30A|0.769223012;MIF|0.771884378;COTL1|0.773319625;PSAP|0.777162465;YPEL5|0.795971359;S100A11|0.807369127;CDA|0.831896582;CSNK2A2|1.206373…	37	1011	605	90438	http://www.ebi.ac.uk/QuickGO/GTerm?id=GO:0030141
7	6,7	cytosolic large ribosomal subunit	GO:0022625	2.25e-14	4.03e-13	RPL39|0.706436187;RPL30|0.75735901;RPL37A|0.762264792;RPL22|0.762752268;RPL38|0.769231504;RPL35A|0.774533243;RPL34|0.78373684;RPL36|0.812559553;RPL26|0.812963546;RPLP2|0.825870804;RPL36A|0.828686725;RPL7|1.222072052;RPL4|1.331321824	13	85	605	90438	http://www.ebi.ac.uk/QuickGO/GTerm?id=GO:0022625
5	5	cytoplasmic, membrane-bounded vesicle	GO:0016023	2.61e-14	4.57e-13	AHSG|0.165015314;ITIH4|0.195366342;C3|0.394006372;A2M|0.413020489;CALML5|0.519101998;F5|0.632416688;B2M|0.633401502;FABP5|0.644041386;LYZ|0.665935809;BST2|0.706116009;VAMP3|0.712248408;SERPINF1|0.726790191;TIMP3|0.735801776;SYPL1|0.738011955;CST3|0.740573232;DYNLL1|0.756626393;TMSB4X|0.757648484;TMEM30A|0.769223012;MIF|0.771884378;COTL1|0.773319625;PSAP|0.777162465;YPEL5|0.795971359;S100A11|0.807…	49	2036	605	90438	http://www.ebi.ac.uk/QuickGO/GTerm?id=GO:0016023
6	5,6	cytoskeleton	GO:0005856	6.31e-14	1.08e-12	TMOD2|0.290984687;KRT1|0.464402901;KRT9|0.470400915;KRT10|0.498333434;KRT2|0.571880999;KRT5|0.621125689;B2RA03|0.657448349;GNG12|0.671393986;DYNLL2|0.679344869;TRIP6|0.680463841;MYL9|0.690808076;KRT14|0.698836609;MDN1|0.699044067;BRK1|0.701952381;B4DE59|0.709747752;EPPK1|0.713562423;CBX3|0.718236075;TAX1BP3|0.729364023;JTB|0.731556035;KRT8|0.7324449;MTPN|0.733775741;SAP30BP|0.752678914;DYNLL1|0.7…	86	5343	605	90438	http://www.ebi.ac.uk/QuickGO/GTerm?id=GO:0005856
5	5	ficolin-1-rich granule	GO:0101002	1.72e-13	2.83e-12	CALML5|0.519101998;CST3|0.740573232;MIF|0.771884378;COTL1|0.773319625;YPEL5|0.795971359;CDA|0.831896582;HSPA8|1.210908698;PSMD14|1.233584486;CCT8|1.242376167;XRCC6|1.242593258;ACLY|1.246554751;HSP90AA1|1.298900982;EEF1A1|1.331252187;HSP90AB1|1.353823184	14	124	605	90438	http://www.ebi.ac.uk/QuickGO/GTerm?id=GO:0101002
molecular functions
3	3	protein binding	GO:0005515	1.68e-73	1.77e-70	AFP|0.18609243;ITIH4|0.195366342;TMOD2|0.290984687;AFM|0.301292942;GC|0.315128902;B3KPF0|0.32842872;UBE2I|0.344198515;MT1A|0.349236331;C3|0.394006372;OGN|0.405744036;COL3A1|0.411903132;A2M|0.413020489;RBM3|0.44702786;FSTL1|0.45386571;TBC1D10B|0.465209156;KRT10|0.498333434;CCN1|0.499878168;TAGLN3|0.50841502;S100A10|0.549868375;IGKC|0.551780631;SREK1|0.563482286;KRT2|0.571880999;B7Z6Q9|0.577878262;…	353	20288	597	83334	http://www.ebi.ac.uk/QuickGO/GTerm?id=GO:0005515
6	6	poly(A) RNA binding	GO:0044822	8.78e-69	4.64e-66	UBE2I|0.344198515;RBM3|0.44702786;SREK1|0.563482286;NUCKS1|0.615706656;DCD|0.635067998;SF3A2|0.662200939;TRIP6|0.680463841;BST2|0.706116009;SEC61B|0.709169703;HMGN2|0.711668935;EPPK1|0.713562423;DDX46|0.719087144;RPS28|0.728473288;ERH|0.730389488;VIRMA|0.737046555;S100A4|0.742515991;SRP19|0.743668814;LLPH|0.744323759;EIF1AX|0.747479114;TRA2A|0.757140461;RPL30|0.75735901;TMSB4X|0.757648484;RPL37A|…	97	1244	597	83334	http://www.ebi.ac.uk/QuickGO/GTerm?id=GO:0044822
5	5	RNA binding	GO:0003723	2.57e-56	9.03e-54	UBE2I|0.344198515;RBM3|0.44702786;SREK1|0.563482286;DICER1|0.578034476;NUCKS1|0.615706656;DCD|0.635067998;SF3A2|0.662200939;TRIP6|0.680463841;SNRPF|0.692465503;BST2|0.706116009;RPL39|0.706436187;SEC61B|0.709169703;HMGN2|0.711668935;EPPK1|0.713562423;DDX46|0.719087144;Q59GY3|0.726412251;A8K6Q4|0.72737863;RPS28|0.728473288;ERH|0.730389488;SLU7|0.733660891;ZMAT2|0.73556006;VIRMA|0.737046555;S100A4|0…	147	4409	597	83334	http://www.ebi.ac.uk/QuickGO/GTerm?id=GO:0003723
2	2	binding	GO:0005488	5.53e-36	1.46e-33	B4DXQ1|0.153524811;AFP|0.18609243;ITIH4|0.195366342;Q14476|0.282965938;TMOD2|0.290984687;B4E1V0|0.297587418;AFM|0.301292942;SERPINA7|0.30609263;GC|0.315128902;APOA1|0.31876546;B3KPF0|0.32842872;UBE2I|0.344198515;HBA2|0.347696974;MT1A|0.349236331;RBP4|0.370003562;C3|0.394006372;OGN|0.405744036;COL3A1|0.411903132;A2M|0.413020489;SERPINC1|0.416962457;B4DN75|0.438386755;RBM3|0.44702786;FSTL1|0.453865…	508	51612	597	83334	http://www.ebi.ac.uk/QuickGO/GTerm?id=GO:0005488
4	4	enzyme binding	GO:0019899	4.88e-21	1.03e-18	UBE2I|0.344198515;COL3A1|0.411903132;A2M|0.413020489;TBC1D10B|0.465209156;AFDN|0.618161506;HMGA1|0.639503882;RBX1|0.676761719;TRIP6|0.680463841;ATP5IF1|0.68560565;BRK1|0.701952381;SEC61B|0.709169703;STRN|0.709295727;CBX3|0.718236075;Q53HL1|0.72075954;JTB|0.731556035;CDK2AP1|0.733269005;WFS1|0.735091571;TIMP3|0.735801776;ISG15|0.737647493;BANF1|0.738362322;CST3|0.740573232;PTGES3|0.740596409;SUPT4…	85	3707	597	83334	http://www.ebi.ac.uk/QuickGO/GTerm?id=GO:0019899
3	3	macromolecular complex binding	GO:0044877	4.1e-20	7.22e-18	COL3A1|0.411903132;RBM3|0.44702786;CCN1|0.499878168;TAGLN3|0.50841502;B7Z2X4|0.587307156;AFDN|0.618161506;HMGA1|0.639503882;HMGB3|0.648004487;GABARAPL1|0.650717522;HMGN4|0.655886276;TGFBI|0.671174262;RBX1|0.676761719;ATP5IF1|0.68560565;LUM|0.6985652;KRT14|0.698836609;BRK1|0.701952381;SEC61B|0.709169703;STRN|0.709295727;HMGN2|0.711668935;EPPK1|0.713562423;HDGFL2|0.725848058;KRT8|0.7324449;WFS1|0.7…	74	3000	597	83334	http://www.ebi.ac.uk/QuickGO/GTerm?id=GO:0044877
4	4	cell adhesion molecule binding	GO:0050839	1.43e-19	2.15e-17	COL3A1|0.411903132;CCN1|0.499878168;AFDN|0.618161506;TGFBI|0.671174262;B4DE59|0.709747752;ISG15|0.737647493;ARGLU1|0.772906812;RPL34|0.78373684;RANBP1|0.786662623;ICAM5|0.788933691;ITGA2|0.795534998;H1FX|0.806275317;S100A11|0.807369127;AHNAK|0.814258602;RPS26|0.815287739;DIAPH3|0.819278237;CTNND1|0.827186243;CHMP2B|0.827661233;RACK1|1.200203431;HSPA8|1.210908698;EEF1G|1.219339681;SERBP1|1.2281987…	36	714	597	83334	http://www.ebi.ac.uk/QuickGO/GTerm?id=GO:0050839
5	5	cadherin binding	GO:0045296	3.2e-18	4.22e-16	AFDN|0.618161506;B4DE59|0.709747752;ARGLU1|0.772906812;RPL34|0.78373684;RANBP1|0.786662623;H1FX|0.806275317;S100A11|0.807369127;AHNAK|0.814258602;RPS26|0.815287739;DIAPH3|0.819278237;CTNND1|0.827186243;CHMP2B|0.827661233;RACK1|1.200203431;HSPA8|1.210908698;EEF1G|1.219339681;SERBP1|1.228198775;OLA1|1.235484448;RPS2|1.238051864;S100P|1.240300943;CCT8|1.242376167;PCBP1|1.244934951;SH3GL1|1.248887176…	28	435	597	83334	http://www.ebi.ac.uk/QuickGO/GTerm?id=GO:0045296
2	2	structural molecule activity	GO:0005198	2.92e-16	3.43e-14	OGN|0.405744036;COL3A1|0.411903132;KRT1|0.464402901;KRT9|0.470400915;KRT10|0.498333434;CCN1|0.499878168;KRT2|0.571880999;KRT5|0.621125689;HMGA1|0.639503882;B2RA03|0.657448349;MYL9|0.690808076;LUM|0.6985652;KRT14|0.698836609;RPL39|0.706436187;B4DE59|0.709747752;EPPK1|0.713562423;RPS28|0.728473288;KRT8|0.7324449;RPL30|0.75735901;RPL37A|0.762264792;RPL22|0.762752268;RPL38|0.769231504;KRT78|0.7698857…	62	2604	597	83334	http://www.ebi.ac.uk/QuickGO/GTerm?id=GO:0005198
4	4	nucleic acid binding	GO:0003676	5.09e-15	5.38e-13	UBE2I|0.344198515;RBM3|0.44702786;SREK1|0.563482286;DICER1|0.578034476;NUCKS1|0.615706656;DCD|0.635067998;HMGA1|0.639503882;HMGB3|0.648004487;CNBP|0.648297935;HMGN4|0.655886276;SF3A2|0.662200939;TRIP6|0.680463841;SNRPF|0.692465503;BST2|0.706116009;RPL39|0.706436187;CRIP1|0.708250204;SEC61B|0.709169703;HMGN2|0.711668935;EPPK1|0.713562423;ZNF93|0.715450432;DDX46|0.719087144;HDGFL2|0.725848058;Q59GY…	190	15487	597	83334	http://www.ebi.ac.uk/QuickGO/GTerm?id=GO:0003676
3	3	structural constituent of ribosome	GO:0003735	1.98e-13	1.9e-11	RPL39|0.706436187;RPS28|0.728473288;RPL30|0.75735901;RPL37A|0.762264792;RPL22|0.762752268;RPL38|0.769231504;RPS21|0.773761839;RPL35A|0.774533243;RPS12|0.775170818;RPL34|0.78373684;RPS25|0.794752097;B2R4C1|0.79648282;Q59GX9|0.800641786;Q7Z612|0.804574148;MRPS23|0.805970013;RPS27|0.806228236;RPS29|0.80722528;RPL36|0.812559553;RPL26|0.812963546;MRPS17|0.814955937;RPS26|0.815287739;FAU|0.824244219;RP…	31	837	597	83334	http://www.ebi.ac.uk/QuickGO/GTerm?id=GO:0003735
4	4	identical protein binding	GO:0042802	2.35e-12	2.07e-10	S100A10|0.549868375;B2M|0.633401502;FABP5|0.644041386;LYZ|0.665935809;DYNLL2|0.679344869;ATP5IF1|0.68560565;BRK1|0.701952381;BST2|0.706116009;CBX3|0.718236075;BANF1|0.738362322;CST3|0.740573232;S100A4|0.742515991;DPY30|0.750444942;CISD1|0.756555608;DYNLL1|0.756626393;MIF|0.771884378;SUB1|0.775269558;PSAP|0.777162465;MARCKS|0.777731965;NCL|0.788878594;MID1IP1|0.790211093;TNNC1|0.796367876;LGALS1|0…	50	2231	597	83334	http://www.ebi.ac.uk/QuickGO/GTerm?id=GO:0042802
3	3	organic cyclic compound binding	GO:0097159	3.46e-12	2.81e-10	B4DXQ1|0.153524811;Q14476|0.282965938;AFM|0.301292942;GC|0.315128902;UBE2I|0.344198515;HBA2|0.347696974;RBM3|0.44702786;B3VL31|0.534319061;ERAL1|0.542307307;SREK1|0.563482286;DICER1|0.578034476;A8K8B2|0.593209238;FKBP14|0.614019585;NUCKS1|0.615706656;DCD|0.635067998;SCYL1|0.635710458;HMGA1|0.639503882;HMGB3|0.648004487;CNBP|0.648297935;CDK9|0.649134031;HMGN4|0.655886276;SF3A2|0.662200939;O14597|0…	274	26972	597	83334	http://www.ebi.ac.uk/QuickGO/GTerm?id=GO:0097159
3	3	heterocyclic compound binding	GO:1901363	5.8e-12	4.37e-10	B4DXQ1|0.153524811;Q14476|0.282965938;AFM|0.301292942;UBE2I|0.344198515;HBA2|0.347696974;RBM3|0.44702786;B3VL31|0.534319061;ERAL1|0.542307307;SREK1|0.563482286;DICER1|0.578034476;A8K8B2|0.593209238;FKBP14|0.614019585;NUCKS1|0.615706656;DCD|0.635067998;SCYL1|0.635710458;HMGA1|0.639503882;HMGB3|0.648004487;CNBP|0.648297935;CDK9|0.649134031;HMGN4|0.655886276;SF3A2|0.662200939;O14597|0.666034988;FKBP…	272	26828	597	83334	http://www.ebi.ac.uk/QuickGO/GTerm?id=GO:1901363
6	6	mRNA binding	GO:0003729	3.61e-11	2.54e-09	RBM3|0.44702786;RPL30|0.75735901;NCL|0.788878594;SRSF3|0.794282113;PTBP2|0.805986076;TAF15|0.808790626;HNRNPA0|0.811275566;RPL26|0.812963546;SLBP|0.81518019;RPS26|0.815287739;CARHSP1|0.8204575;CSTF2T|0.824533236;PPP1R8|0.827042517;LSM1|0.828117136;RPL7|1.222072052;SERBP1|1.228198775;RPS2|1.238051864;ILF3|1.242433362;CELF1|1.242751523;PCBP1|1.244934951;EIF4G1|1.291084491;HNRNPA1|1.94612365	22	510	597	83334	http://www.ebi.ac.uk/QuickGO/GTerm?id=GO:0003729
4	4	protein complex binding	GO:0032403	2.12e-10	1.4e-08	COL3A1|0.411903132;CCN1|0.499878168;TAGLN3|0.50841502;B7Z2X4|0.587307156;GABARAPL1|0.650717522;HMGN4|0.655886276;TGFBI|0.671174262;RBX1|0.676761719;LUM|0.6985652;KRT14|0.698836609;BRK1|0.701952381;STRN|0.709295727;HMGN2|0.711668935;EPPK1|0.713562423;KRT8|0.7324449;SUPT4H1|0.748180409;MAPRE2|0.749055738;HMGN3|0.756031248;DSTN|0.77562208;MARCKS|0.777731965;CFL2|0.785308365;ICAM5|0.788933691;ITGA2|0…	43	1976	597	83334	http://www.ebi.ac.uk/QuickGO/GTerm?id=GO:0032403
5	5	nucleosomal DNA binding	GO:0031492	7.86e-10	4.86e-08	HMGN4|0.655886276;HMGN2|0.711668935;HMGN3|0.756031248;HMGN1|0.804082045;HMGN5|0.806175851;H1FX|0.806275317;HIST1H1C|0.816505055;HIST1H1E|0.822136776;RBBP4|1.280616973	9	63	597	83334	http://www.ebi.ac.uk/QuickGO/GTerm?id=GO:0031492
4	4	unfolded protein binding	GO:0051082	8.29e-10	4.86e-08	MDN1|0.699044067;PTGES3|0.740596409;TBCA|0.782538807;PFDN2|0.787840183;PFDN4|0.795440029;HSPA8|1.210908698;DNAJA1|1.216823491;B3KX11|1.222845667;Q59ET3|1.227639483;CCT8|1.242376167;CDC37|1.251413289;CANX|1.264812414;HSPA5|1.279256907;B7Z4V2|1.295859804;HSP90AA1|1.298900982;HSP90AB1|1.353823184;TRA1|1.398908361	17	345	597	83334	http://www.ebi.ac.uk/QuickGO/GTerm?id=GO:0051082
4	4	protein dimerization activity	GO:0046983	9.25e-09	4.98e-07	KRT10|0.498333434;S100A10|0.549868375;B2M|0.633401502;DYNLL2|0.679344869;ATP5IF1|0.68560565;BST2|0.706116009;POLE3|0.726924773;BANF1|0.738362322;SUPT4H1|0.748180409;DPY30|0.750444942;DYNLL1|0.756626393;PSAP|0.777162465;BID|0.782479774;HIST2H2BD|0.789953451;ITGA2|0.795534998;TNNC1|0.796367876;LGALS1|0.806278189;S100A11|0.807369127;CBX5|0.808966826;DR1|0.810947465;NFYC|0.811563014;POLR2J3|0.8174317…	43	2246	597	83334	http://www.ebi.ac.uk/QuickGO/GTerm?id=GO:0046983
4	4	ribonucleoprotein complex binding	GO:0043021	9.44e-09	4.98e-07	RBM3|0.44702786;SEC61B|0.709169703;SRP19|0.743668814;CBX5|0.808966826;SNRPD2|0.814523161;RACK1|1.200203431;NEMF|1.207352773;OLA1|1.235484448;SRPRA|1.235897594;SRPRB|1.24080677;HSPA5|1.279256907;SRP72|1.303264191;ABCF1|1.305916245	13	220	597	83334	http://www.ebi.ac.uk/QuickGO/GTerm?id=GO:0043021
4	4	protein binding involved in protein folding	GO:0044183	2.85e-08	1.42e-06	DFFA|0.770068444;PFDN2|0.787840183;HSPA8|1.210908698;CCT8|1.242376167;HSPA5|1.279256907;HSP90AA1|1.298900982;HSP90AB1|1.353823184	7	44	597	83334	http://www.ebi.ac.uk/QuickGO/GTerm?id=GO:0044183
5	5	protein homodimerization activity	GO:0042803	2.96e-08	1.42e-06	S100A10|0.549868375;B2M|0.633401502;DYNLL2|0.679344869;ATP5IF1|0.68560565;BST2|0.706116009;BANF1|0.738362322;DPY30|0.750444942;DYNLL1|0.756626393;PSAP|0.777162465;TNNC1|0.796367876;LGALS1|0.806278189;S100A11|0.807369127;CBX5|0.808966826;PPCS|0.820854973;MFF|0.828165881;S100A13|0.829902405;CDA|0.831896582;RACK1|1.200203431;NAXE|1.205087848;ERP29|1.211052285;RPL7|1.222072052;HM13|1.228762901;S100P|…	28	1145	597	83334	http://www.ebi.ac.uk/QuickGO/GTerm?id=GO:0042803
4	4	protein domain specific binding	GO:0019904	3.33e-08	1.53e-06	UBE2I|0.344198515;DICER1|0.578034476;GNG12|0.671393986;STRN|0.709295727;CBX3|0.718236075;BANF1|0.738362322;DYNLL1|0.756626393;ABCC2|0.760759038;DFFA|0.770068444;CALM2|0.80008888;SRSF5|0.800727533;SARNP|0.80189511;SH3BGRL|0.818197023;CHMP2B|0.827661233;RACK1|1.200203431;HSPA8|1.210908698;DNAJA1|1.216823491;PRKACA|1.238137539;SH3GL1|1.248887176;HSPA5|1.279256907;HSP90AA1|1.298900982;SRP72|1.3032641…	26	1009	597	83334	http://www.ebi.ac.uk/QuickGO/GTerm?id=GO:0019904
6	6	structure-specific DNA binding	GO:0043566	5.67e-08	2.5e-06	HMGN4|0.655886276;HMGN2|0.711668935;HMGN3|0.756031248;SUB1|0.775269558;IMUP|0.780050557;NCL|0.788878594;HMGN1|0.804082045;HMGN5|0.806175851;Q5U071|0.807742432;HIST1H1C|0.816505055;HIST1H1E|0.822136776;FEN1|1.211580135;XRCC6|1.242593258;PCBP1|1.244934951;RBBP4|1.280616973;HNRNPA1|1.94612365	16	405	597	83334	http://www.ebi.ac.uk/QuickGO/GTerm?id=GO:0043566
5	5	endopeptidase regulator activity	GO:0061135	9.61e-08	3.93e-06	AHSG|0.165015314;ITIH4|0.195366342;B7Z8R6|0.203440182;SERPINA7|0.30609263;SERPINF2|0.324532694;ITIH2|0.337612986;C3|0.394006372;A2M|0.413020489;SERPINC1|0.416962457;C4A|0.555642373;BST2|0.706116009;SERPINF1|0.726790191;TIMP3|0.735801776;CST3|0.740573232;ADRM1|1.203360941;PSMD14|1.233584486	16	421	597	83334	http://www.ebi.ac.uk/QuickGO/GTerm?id=GO:0061135
4	4	nucleosome binding	GO:0031491	9.76e-08	3.93e-06	HMGN4|0.655886276;HMGN2|0.711668935;HMGN3|0.756031248;HMGN1|0.804082045;HMGN5|0.806175851;H1FX|0.806275317;HIST1H1C|0.816505055;HIST1H1E|0.822136776;RBBP4|1.280616973	9	108	597	83334	http://www.ebi.ac.uk/QuickGO/GTerm?id=GO:0031491
4	4	chromatin DNA binding	GO:0031490	1.01e-07	3.93e-06	HMGN4|0.655886276;HMGN2|0.711668935;KDM3B|0.752801558;HMGN3|0.756031248;HMGN1|0.804082045;HMGN5|0.806175851;H1FX|0.806275317;HIST1H1C|0.816505055;HIST1H1E|0.822136776;RBBP4|1.280616973	10	143	597	83334	http://www.ebi.ac.uk/QuickGO/GTerm?id=GO:0031490
4	4	peptidase regulator activity	GO:0061134	1.67e-07	6.28e-06	AHSG|0.165015314;ITIH4|0.195366342;B7Z8R6|0.203440182;SERPINA7|0.30609263;SERPINF2|0.324532694;ITIH2|0.337612986;C3|0.394006372;A2M|0.413020489;SERPINC1|0.416962457;C4A|0.555642373;BST2|0.706116009;SERPINF1|0.726790191;TIMP3|0.735801776;CST3|0.740573232;RACK1|1.200203431;ADRM1|1.203360941;PSMD14|1.233584486	17	496	597	83334	http://www.ebi.ac.uk/QuickGO/GTerm?id=GO:0061134
4	4	protein C-terminus binding	GO:0008022	2.35e-07	8.57e-06	UBE2I|0.344198515;AFDN|0.618161506;TAX1BP3|0.729364023;BANF1|0.738362322;DYNLL1|0.756626393;NCL|0.788878594;MID1IP1|0.790211093;SARNP|0.80189511;XRCC6|1.242593258;SH3GL1|1.248887176;CDC37|1.251413289;SH3GL2|1.305709121	12	242	597	83334	http://www.ebi.ac.uk/QuickGO/GTerm?id=GO:0008022
6	6	ubiquitin protein ligase binding	GO:0031625	3.43e-07	1.21e-05	UBE2I|0.344198515;RBX1|0.676761719;WFS1|0.735091571;ISG15|0.737647493;BID|0.782479774;RALB|0.812611815;HSPA8|1.210908698;AURKA|1.21414322;DNAJA1|1.216823491;HM13|1.228762901;PRKACA|1.238137539;CCDC50|1.259706796;HSPA5|1.279256907;HSP90AA1|1.298900982;TUBB|1.349694391;HSP90AB1|1.353823184	16	463	597	83334	http://www.ebi.ac.uk/QuickGO/GTerm?id=GO:0031625
5	5	ubiquitin-like protein ligase binding	GO:0044389	5.23e-07	1.78e-05	UBE2I|0.344198515;RBX1|0.676761719;WFS1|0.735091571;ISG15|0.737647493;BID|0.782479774;RALB|0.812611815;HSPA8|1.210908698;AURKA|1.21414322;DNAJA1|1.216823491;HM13|1.228762901;PRKACA|1.238137539;CCDC50|1.259706796;HSPA5|1.279256907;HSP90AA1|1.298900982;TUBB|1.349694391;HSP90AB1|1.353823184	16	478	597	83334	http://www.ebi.ac.uk/QuickGO/GTerm?id=GO:0044389
5	5	ion channel inhibitor activity	GO:0008200	9.68e-07	3.19e-05	ENSA|0.7533372;PHPT1|0.785310749;CALM2|0.80008888;PCSK9|0.82186544;NEDD4L|0.826183332;RACK1|1.200203431	6	46	597	83334	http://www.ebi.ac.uk/QuickGO/GTerm?id=GO:0008200
4	4	channel inhibitor activity	GO:0016248	1.1e-06	3.53e-05	ENSA|0.7533372;PHPT1|0.785310749;CALM2|0.80008888;PCSK9|0.82186544;NEDD4L|0.826183332;RACK1|1.200203431	6	47	597	83334	http://www.ebi.ac.uk/QuickGO/GTerm?id=GO:0016248
3	3	chromatin binding	GO:0003682	1.22e-06	3.78e-05	NUCKS1|0.615706656;HMGA1|0.639503882;HMGB3|0.648004487;HMGN4|0.655886276;COMMD3-BMI1|0.694229533;HMGN2|0.711668935;HDGFL2|0.725848058;KDM3B|0.752801558;HMGN3|0.756031248;HMGB1|0.777099365;CKS2|0.795823369;HMGN1|0.804082045;HMGN5|0.806175851;H1FX|0.806275317;CBX5|0.808966826;DEK|0.809716595;MTA3|0.814401788;HIST1H1C|0.816505055;HIST1H1E|0.822136776;UBTF|0.830474064;OBI1|1.267340364;RBBP4|1.2806169…	22	917	597	83334	http://www.ebi.ac.uk/QuickGO/GTerm?id=GO:0003682
4	4	enzyme inhibitor activity	GO:0004857	1.34e-06	4.04e-05	AHSG|0.165015314;ITIH4|0.195366342;B7Z8R6|0.203440182;SERPINA7|0.30609263;SERPINF2|0.324532694;ITIH2|0.337612986;C3|0.394006372;A2M|0.413020489;SERPINC1|0.416962457;C4A|0.555642373;ATP5IF1|0.68560565;BST2|0.706116009;SERPINF1|0.726790191;TIMP3|0.735801776;CST3|0.740573232;ENSA|0.7533372;DFFA|0.770068444;PPP1R2|0.806161843;PPP1R8|0.827042517;RACK1|1.200203431;BOD1L1|1.23385894	21	850	597	83334	http://www.ebi.ac.uk/QuickGO/GTerm?id=GO:0004857
6	6	endopeptidase inhibitor activity	GO:0004866	2.24e-06	6.56e-05	AHSG|0.165015314;ITIH4|0.195366342;B7Z8R6|0.203440182;SERPINA7|0.30609263;SERPINF2|0.324532694;ITIH2|0.337612986;C3|0.394006372;A2M|0.413020489;SERPINC1|0.416962457;C4A|0.555642373;BST2|0.706116009;SERPINF1|0.726790191;TIMP3|0.735801776;CST3|0.740573232	14	412	597	83334	http://www.ebi.ac.uk/QuickGO/GTerm?id=GO:0004866
3	3	small molecule binding	GO:0036094	2.81e-06	8.03e-05	B4DXQ1|0.153524811;AFP|0.18609243;AFM|0.301292942;GC|0.315128902;APOA1|0.31876546;UBE2I|0.344198515;RBP4|0.370003562;RBM3|0.44702786;ERAL1|0.542307307;SREK1|0.563482286;DICER1|0.578034476;A8K8B2|0.593209238;SCYL1|0.635710458;FABP5|0.644041386;CDK9|0.649134031;O14597|0.666034988;RAB30|0.692572099;MDN1|0.699044067;DDX46|0.719087144;B4DN59|0.725287465;ERH|0.730389488;PIK3C3|0.736738787;TRA2A|0.75714…	132	12548	597	83334	http://www.ebi.ac.uk/QuickGO/GTerm?id=GO:0036094
5	5	peptidase inhibitor activity	GO:0030414	3.85e-06	0.000107	AHSG|0.165015314;ITIH4|0.195366342;B7Z8R6|0.203440182;SERPINA7|0.30609263;SERPINF2|0.324532694;ITIH2|0.337612986;C3|0.394006372;A2M|0.413020489;SERPINC1|0.416962457;C4A|0.555642373;BST2|0.706116009;SERPINF1|0.726790191;TIMP3|0.735801776;CST3|0.740573232	14	432	597	83334	http://www.ebi.ac.uk/QuickGO/GTerm?id=GO:0030414
5	5	protease binding	GO:0002020	5.37e-06	0.000145	COL3A1|0.411903132;A2M|0.413020489;TIMP3|0.735801776;CST3|0.740573232;MIF|0.771884378;PSAP|0.777162465;CD70|0.786511199;ADRM1|1.203360941;ALPI|1.583497581	9	174	597	83334	http://www.ebi.ac.uk/QuickGO/GTerm?id=GO:0002020
5	5	kinase binding	GO:0019900	7.43e-06	0.000196	TRIP6|0.680463841;JTB|0.731556035;MARCKS|0.777731965;CAVIN3|0.792466579;CKS2|0.795823369;CALM2|0.80008888;SRSF5|0.800727533;KIF20A|0.801718913;HNRNPA0|0.811275566;LSM2|0.823606722;RACK1|1.200203431;AURKA|1.21414322;TUBA4A|1.230928916;PRKACA|1.238137539;CDC37|1.251413289;LDHA|1.26267462;LDHB|1.26370556;HSP90AA1|1.298900982;SH3GL2|1.305709121;EEF1A1|1.331252187;HSP90AB1|1.353823184;MSN|1.356219597	22	1028	597	83334	http://www.ebi.ac.uk/QuickGO/GTerm?id=GO:0019900
3	3	enzyme regulator activity	GO:0030234	9.93e-06	0.000256	AHSG|0.165015314;ITIH4|0.195366342;B7Z8R6|0.203440182;SERPINA7|0.30609263;SERPINF2|0.324532694;ITIH2|0.337612986;C3|0.394006372;A2M|0.413020489;SERPINC1|0.416962457;TBC1D10B|0.465209156;CALML5|0.519101998;B4DRL9|0.546826669;C4A|0.555642373;CKS1B|0.662648021;ATP5IF1|0.68560565;BST2|0.706116009;SERPINF1|0.726790191;TIMP3|0.735801776;CST3|0.740573232;ENSA|0.7533372;DYNLL1|0.756626393;DFFA|0.77006844…	42	2831	597	83334	http://www.ebi.ac.uk/QuickGO/GTerm?id=GO:0030234
5	5	DNA polymerase binding	GO:0070182	1.15e-05	0.00029	CDK2AP1|0.733269005;PTGES3|0.740596409;HSP90AA1|1.298900982;HSP90AB1|1.353823184	4	20	597	83334	http://www.ebi.ac.uk/QuickGO/GTerm?id=GO:0070182
4	4	scaffold protein binding	GO:0097110	1.27e-05	0.000312	KRT5|0.621125689;DYNLL2|0.679344869;KRT8|0.7324449;DYNLL1|0.756626393;CDC37|1.251413289;HSP90AA1|1.298900982	6	71	597	83334	http://www.ebi.ac.uk/QuickGO/GTerm?id=GO:0097110
5	5	ribosome binding	GO:0043022	1.67e-05	0.000401	SEC61B|0.709169703;SRP19|0.743668814;RACK1|1.200203431;OLA1|1.235484448;HSPA5|1.279256907;SRP72|1.303264191;ABCF1|1.305916245	7	111	597	83334	http://www.ebi.ac.uk/QuickGO/GTerm?id=GO:0043022
4	4	cytoskeletal protein binding	GO:0008092	1.86e-05	0.000436	TMOD2|0.290984687;GC|0.315128902;TAGLN3|0.50841502;KRT2|0.571880999;B7Z2X4|0.587307156;AFDN|0.618161506;GABARAPL1|0.650717522;DYNLL2|0.679344869;MYL9|0.690808076;PFN2|0.7117008;EPPK1|0.713562423;S100A4|0.742515991;MAPRE2|0.749055738;DYNLL1|0.756626393;TMSB4X|0.757648484;COTL1|0.773319625;DSTN|0.77562208;MARCKS|0.777731965;TBCA|0.782538807;MYO1C|0.783431045;CFL2|0.785308365;TMSB10|0.795384355;TNNC…	44	3106	597	83334	http://www.ebi.ac.uk/QuickGO/GTerm?id=GO:0008092
6	6	protein-disulfide reductase activity	GO:0047134	1.99e-05	0.000458	TXNDC17|0.775277662;TXN|0.804609783;PGK1|1.270199199	3	8	597	83334	http://www.ebi.ac.uk/QuickGO/GTerm?id=GO:0047134
5	5	carboxylic acid binding	GO:0031406	2.51e-05	0.000564	AFP|0.18609243;AFM|0.301292942;FABP5|0.644041386;O14597|0.666034988;B4DN59|0.725287465;PSAP|0.777162465;NDUFAB1|0.781446025;ASS1|1.216347729;P4HA1|1.252491897;B4DGN8|1.273234955;EGLN1|1.299428661;CPS1|1.323028603;AKR1C1|1.493245959	13	445	597	83334	http://www.ebi.ac.uk/QuickGO/GTerm?id=GO:0031406
4	4	organic acid binding	GO:0043177	3.3e-05	0.000719	AFP|0.18609243;AFM|0.301292942;FABP5|0.644041386;O14597|0.666034988;B4DN59|0.725287465;PSAP|0.777162465;NDUFAB1|0.781446025;ASS1|1.216347729;P4HA1|1.252491897;B4DGN8|1.273234955;EGLN1|1.299428661;CPS1|1.323028603;AKR1C1|1.493245959	13	457	597	83334	http://www.ebi.ac.uk/QuickGO/GTerm?id=GO:0043177
4	4	calcium-dependent protein binding	GO:0048306	3.34e-05	0.000719	A2M|0.413020489;WFS1|0.735091571;S100A4|0.742515991;TNNC1|0.796367876;S100A11|0.807369127;S100P|1.240300943	6	84	597	83334	http://www.ebi.ac.uk/QuickGO/GTerm?id=GO:0048306
4	4	heat shock protein binding	GO:0031072	3.66e-05	0.000773	PTGES3|0.740596409;HSPA8|1.210908698;DNAJA1|1.216823491;DNAJC7|1.23678357;CDC37|1.251413289;HSPA5|1.279256907;FKBP4|1.280973519;HSP90AB1|1.353823184	8	171	597	83334	http://www.ebi.ac.uk/QuickGO/GTerm?id=GO:0031072
